# Supplementary material for: Identification of Breast Cancer Metastasis Markers from Gene Expression Profiles Using Machine Learning Approaches
Source: Genes (Basel). 2023 Sep 20;14(9):1820. doi: 10.3390/genes14091820 (PMC10530902; doi:10.3390/genes14091820)
Supplement: Supplementary file 1 [file genes-14-01820-s001.zip › supplement_Tables_S1~S6.xlsx]

## Sheet: Title & Authors
n Title
Identification of Breast Cancer Metastasis Markers from Gene Expression Profiles Using Machine Learning Approaches
n Authors
Jinmyung Jung 1,* and Sunyong Yoo 2,*
1Division of Data Science, College of Information and Communication Technology, The University of Suwon, Hwaseong 18323, Republic of Korea
2Department of ICT Convergence System Engineering, Chonnam National University, Gwangju 61005, Republic of Korea
*Correspondence: jmjung@suwon.ac.kr (J.J.); syyoo@jnu.ac.kr (S.Y.)

## Sheet: Table_S1
Table_S1. Metastasis scores computed with feature importance (FI) and AUC of the 50 XGB models
* The genes are sorted by MS, and only the top 1000 genes were presented
MS: metastasis score
EP: empirical P value
Mk: kth XGB model
	AUC	ZNF676	FAM163B	LDOC1	FAM78B	IRF1	SLFNL1	CHRNA5	STK40	MISP	SPPL2C	TMPRSS5	GRB7	CCDC93	CLDN4	LINGO3	CERS4	CTXND1	PLK2	ZBED3	ALOXE3	RGS4	PLSCR2	FAM193A	EGR2	GSTM5	OTOGL	SPTSSA	ESRP2	BSPRY	SOX15	KRT13	VCPKMT	SLC28A1	BTBD8	SLC16A1	C4orf45	GOLM1	IFT80	TAF8	KCNQ5	KRT4	FBLN7	SEMA4D	PTGS2	EXOSC10	H2BU1	GAP43	FOXC2
MS	-	0.123038	0.0936314	0.0878362	0.0874894	0.086791	0.0808985	0.0795127	0.0776414	0.0673326	0.063177	0.0629985	0.0609505	0.0573294	0.0534201	0.0525076	0.0487428	0.0468014	0.0453458	0.0426736	0.041407	0.0412201	0.0409605	0.0380486	0.0372157	0.0367617	0.0357936	0.0342221	0.0335103	0.0332182	0.0331173	0.0328728	0.0327594	0.0326183	0.0321704	0.0311381	0.0308364	0.0307737	0.0300722	0.029309	0.0292812	0.0284032	0.0283851	0.0280109	0.0279758	0.0276942	0.0273251	0.0270622	0.0269218
EP	-	0	0	0	0	0	1.1588e-05	1.1588e-05	1.1588e-05	2.31759e-05	3.47639e-05	3.47639e-05	4.05578e-05	6.37338e-05	8.11157e-05	8.11157e-05	0.000104292	0.000127468	0.000133261	0.000185407	0.000202789	0.000202789	0.000208583	0.000260729	0.000272317	0.000283905	0.000318669	0.000376609	0.000411372	0.000411372	0.000428754	0.000440342	0.00045193	0.000457724	0.000469312	0.000544634	0.000562016	0.000562016	0.000590986	0.000619956	0.000619956	0.000689483	0.000689483	0.000712659	0.000718453	0.000747423	0.000764805	0.000787981	0.000805363
M1	0.626066	0.0255709	0.00480898	0	0.00375957	0.0135015	0.00246211	0	0.000174248	0	0.00586524	0	0.00648485	0	0	0.0027098	0.000890299	0.0023083	0	0	0	0.00445073	0	0	0	0	0	7.73514e-05	0	0	0.00121322	0.000124955	0.00930144	0	0	0	0.000114126	0.000613049	0	0	0.000165664	0.000519272	3.32146e-05	0	0.00605041	0	0.000491235	0	0
M2	0.49347	0.000127752	0	0.00025704	0	0	0.000343708	0	0	0.023449	0.00575346	0	0	0.000277954	0	0	0.00074551	0	0	0	0	0	0	0	0.00104785	0.00173723	0	0	0	0	0.00206664	0.00121996	0	0	0	0	0.000101437	0.001458	0	0	0	0	0	0	0.000991443	0	0.000932456	0.000403121	0
M3	0.56903	0.00482923	0.00101867	0.00481591	0.00441733	0	0	0	0.00442757	0	0.00527686	0	0	0	0	0	0	3.94728e-05	0.000355147	0.0103934	0	0.0147647	0	0	0	0.00110336	0	0	0.00311418	0	0.00192514	7.60171e-05	0	0	0	0	0	0.00101431	0.00979653	0	0.000346951	0.00101425	0.000751089	0	0	0	0.00305106	0	0
M4	0.602612	0	0.00469461	0.00479135	0.00411455	0	0.00449974	0	0.00049271	0	0	0	0	0.000212687	0	0	0.0106027	0.00040862	0.000982518	0.00688587	0.000415093	0	0	0	0	0	0.00326958	0	0	0	0.00010919	0.000180439	0	0.0114783	0	0	6.76007e-05	0	0.00345522	0.000121311	0.00870229	0	0.00624952	0	7.96975e-05	0	0.000464904	0	0
M5	0.539046	0	0	0	0.000242713	0.0106985	0.00181916	0	0.00024293	0.0119276	0	0	0	0.0063251	0.00278439	0	0	0.002108	0	0	0	7.99019e-05	0	0	6.82901e-05	0.000212376	0	0	0	0	0.00240594	0.000735638	0	0.00219905	0	0	0	0	0	0	0	0.00284362	3.39699e-05	0.00950566	0	0	0.0001043	0.000627943	0
M6	0.611141	0	0.0012539	0.0038323	0.000781952	0.0186078	3.31824e-05	0	0	0	0	0.00471251	0	0	0	0	0	0	0.00029013	0	0	0	0	0.0122779	0	0.0062159	0	0	0	0	0.00410292	0.00169428	0	0	0.00278396	0	0.000370825	0	0	0	0	0	0.0017482	0	0.00422937	5.24189e-05	0.00287645	0	0
M7	0.580757	0.0025733	0.00840932	0	0.00446958	0.00811137	0.00637274	0	0.00977589	0	0.000134128	0	0.00183524	0.001683	0	0	0	0.0137227	0.000937324	0	0	0	0.0103261	0	0	0.00136538	0	0	0	0.00104599	0.00167424	5.83979e-05	0	0	0	0	0.00761144	0	0.00635987	0	0	0	0.00366471	0	0.00140518	0	8.96819e-05	0.00639504	0
M8	0.549174	0.0171522	0.003808	0.000237858	0.00284615	0	0.00477671	0	0	0	0.0039828	0	0.0064414	0	0	0	0	0.000191359	0	0	2.80467e-05	0	0	0	0	3.32944e-05	0	0	0	0.00154144	0	0.000496091	0	0	0	0	0.00213924	0	0	0	0.00724221	0	0	0	0	0.00637563	0.000125236	0	0
M9	0.555437	0	0.00513195	0.00503785	0.00303861	0	0	0	0.00945109	0	0.00204601	0	0	0.00240967	0	0.00665328	0	0	0.000173286	0	0	0.000550518	0	0	0	0.00499075	0	0.0179454	0.00811581	0	0.00239807	7.2181e-05	0	0	0	0.000926746	0	0.00563908	0	0	0	0.00539073	4.26948e-05	0	0.0161366	0	0.000726417	0.00443308	0
M10	0.604344	0	0.00396248	0.00481178	0.00260505	0	0	0	0	0.00957403	0.00501361	0	0.0185097	0.00412506	0	0	0	0.000201192	0	0.00571218	0.00194372	0	0	0.00740228	0.00945089	0	0	0	0	0.00492059	0	0.000122735	0	0.00305993	0.0043493	0	0.00519052	0	0	0	0	0.000486158	0	0.00714502	0	0	0.00066235	0	0
M11	0.691764	9.38301e-05	0.00515714	0.0048164	0.00317862	0.00660276	0.0015756	0.0104107	0.00439596	0	0	0	0.00324705	0.00938968	0	0	0	6.39623e-05	0.000101841	0	0.000953622	0.000381881	0	0	0	0.000346593	0.0102719	0	0	0	0	0.00265991	0	0.00480371	0	0.000169277	9.40623e-05	0	0.000889188	0.000700314	0	0.00240353	0	0	0	0	0.000542843	0	0
M12	0.540245	0	0	0	0.00269673	0	0.00164693	0.00938267	0	0	0	0	0	0.00105704	0	0	0	0.00499338	0.000119355	0.00012885	0.00286109	0	0	0	0	0.000213343	0	0.000809557	0	0	0.000339771	0	0.0093349	0	0	0	0	0	0.000567041	0.00637737	0	0	3.18953e-05	0	0	0.00105952	0	0.000634525	0
M13	0.640059	0	0.00340379	0	0.00341514	0	5.75635e-05	0.00434939	0.00603525	0	0.000173839	0	0	0	0	0	0	0.000524324	0.000141998	0.00104508	0	0.00610571	0	0	0	0	0	0	0	0	0.000752329	0.000975763	0	0	0	0	0.00301114	0.004139	0	0	0	0.000222489	0	0	0.00108602	6.30401e-05	0.00112898	0	0
M14	0.598747	0.0229155	0.0003431	0	0.00323134	0.0113617	0.00368386	0.00898544	0	0	0.00188169	0	0	0	0.00253614	0.00140886	0.0128438	0.000979633	0.00130542	0	0.00034175	0	0	0	0	0.00025898	0	0	0.00195561	0.000234915	4.12397e-05	0.0013328	0	0	0	0	0	0	0.00586503	0.00940355	0	0	0	0	0.00156181	0	0.00213363	0	0
M15	0.582489	0	0	0.00608119	0.00271312	0	0	0.00660859	0	0	0.00130485	0.0134503	0	0.00986095	0.00100608	0.00610538	0	0.000158167	0.000100829	0	0	0.000275806	0	0	0	0	0.00209243	0.00424966	0.000870283	0	8.28128e-05	0.000158774	0	0	0.000103094	0.0119138	0	0	0	0	0	0	8.54018e-05	0	0.00544157	0	0.000763992	0.000251134	0
M16	0.638459	0.0110087	0.00143129	0.00521491	0.0049209	0	4.63992e-05	0	0	0	0	0.0191219	0	0	0.00841847	0.00552096	0	0.00248787	0.00186497	0	0.00506392	0	0	0.007963	0	0.00184024	0	0	0.000598787	0.00198339	9.13324e-05	0.000266823	0	0	0	0	0.00142196	0	0	0.00088353	0	0	0.00187608	0	0	0.0029217	0.000339652	0.000727513	0
M17	0.616071	0.00792711	0.00803916	0.00541481	0.00490455	0	0	0.0107281	0.0124557	0.00692033	0.0123899	0	0	0.000122156	0.00573738	0.0103829	0	0.00136304	0.00023964	9.46936e-05	0.00215468	0	0	0	0.000321275	0.00374069	0	0	0.00131242	0	1.74401e-05	3.36412e-05	0	0	0	0	0	0.000438614	0	0	0	5.12863e-05	0.00325332	0	0	0	0.002304	0	0
M18	0.621135	0	0	0.00186133	0.00445391	0	0.00326594	0.00454384	0.00677189	0.00215142	0.0039695	0	0	0	0.00168922	0.0100227	0	0	0.000211777	0.00430968	0.000263148	0.000232549	0.00588636	0	0	0	0	0.00299336	0	0	0.00022382	0.00111757	0.0156411	0	0	0	7.52793e-05	0.0100874	0	0	0.000290235	0	0.000148764	0.0013676	0	0.000505091	0.000117325	0	0
M19	0.624733	0	0.000605663	0	0.00358996	0	0.000296877	0.0154368	0.00559974	0.000418462	0.00177129	0.00499161	0	0.00441826	0	0	0	0	0.00232691	0	0.00362391	7.44262e-05	0	0.00492462	0	0.00562913	0.00181774	0	0	0.000211516	0	0.00943157	0	0	0	0	0	0.000573701	0.00829433	0	0	0	0.00681074	0	0	6.54459e-05	0.00083916	0	0
M20	0.58822	0.00736408	0.00119111	0.00569008	0.00338209	0.0129501	7.20339e-05	0.00726811	0	3.89632e-05	0.0123482	0.000724159	0	0.000380753	0	0.00656591	0	0	0.00121302	0	0.000218645	0	0	0	0.000123548	0	0	0.00674766	0	0	0	0.000208651	0	0	0.00927481	0	0	0	0.000186271	0.00696395	0	0.000719629	0	0	0	0	0.00130523	0	0
M21	0.598081	0.00728928	0.00516591	0.0046458	0.00296324	0	0.0153233	0	0.00399507	0	0	0	0.0148687	0.000432481	0	0	0	0.00449085	0.00445561	0	0.0119345	0	0	0	0.00109038	0	0	0	0	0.00309406	0.000214099	0.00112523	0	0	0	0	0	0.00282461	0	0	0.000524354	0.000432298	6.98713e-05	0.0040534	0.00395309	0.00027036	4.62872e-05	0	0
M22	0.564899	0	0.00526218	0.00390725	0.00167501	0	0	0	0	0	0.000892891	0.0154119	0.00490199	0	0	0	0	3.30807e-05	0	0	0	0	0	0	0	0	0.00206196	0	0.0115015	0	0.00205999	0.00254962	0	0	0	0.00163851	0.000626539	0	0	0	0	0	0.000670511	0	0	0.00011195	0.000779976	0	0
M23	0.60008	0.007488	0	1.43066e-05	0.00609995	0	0.00636604	0.00116225	0	0	0	0.00473387	0	0.000141114	0	0	0.0143684	0.00312574	0.000152889	0	0	0.00578921	0	0	0	0	0	0	0	0	0	0.000540408	0	0	0	0	0	0.00532774	0.000147292	4.18336e-05	0	0.000915955	0.00118865	0	0	0	0.00162945	0	0
M24	0.529584	0.0168518	0	0	0.00362011	0	0	0	0.00205888	0	0	0.00759533	0	0.000343632	0.00469778	0	0	0	0.0036428	0	0.000223602	0.000266914	0	0.0063385	0	0	0	0.00546623	0	0	0	0.00213834	0	0.00591381	0	0	0	0	0	0.0122642	0	0	0	0	0	6.52617e-05	0.00431605	0	0
M25	0.666045	0	0.00364199	0	0.000208497	0	0.000387117	0	0	0.00261795	0	0	0	0.00925453	0.0102846	0	0	0.000136604	0.00409593	0	5.26036e-05	0	0	0	0	0.00593021	0.000167115	0.000842158	0	0.00724408	0.00202747	0.00134589	0	0	0.00946388	0	0.00184641	0	0	6.86621e-05	0	0	7.17161e-05	0.00261	0.00160849	0.00221115	0.000380157	0	0
M26	0.561434	0	0.0138319	0	0.00308114	0.0118176	0.00176508	0	0	0	0.00126724	0	0	0	0	0	0	0.00146281	0.00814404	0	0	0.000150067	0	0	0	0.000177479	0	0	0	0.00437605	0	0.00151414	0	0	0.0089832	0	0	0	0	6.19268e-05	0	0.000754911	3.04621e-05	0.0118744	0	0.000187152	0	0	0
M27	0.582623	0	0.000464414	0.00432648	0.00441059	0.0101545	0.00374682	0.0102981	0.00667814	0	0	0.00944302	0	0	0	0.000905026	0	0.00464466	0.00287773	0	4.36029e-05	0	0.00892875	0	0	0.00131839	0	0	0	0.00231277	0	0.000608015	0	0	0	0.0113597	0	0	0	0	0	6.13024e-05	0	0	0	0.00177353	0.000712921	0	0
M28	0.647521	0	0.00793356	0.00235364	0.00283213	0	0.000848191	0	0.00928148	0	0.00223536	0	0.0128632	0.0010188	0	0	0.0117739	0.000195651	0.00618516	0	0	0	0.00786998	0	0	0.00234779	0	0.00640179	0	0	0.00626248	0.00193638	0.00164224	0	0	0.00377144	0.00538422	0	0	0	0.0194631	0	0	0	0	0.012531	0.000107566	0	0.0163224
M29	0.573694	0.0126893	0.0028759	0.00612474	0.00430726	0	0.00120519	0.00659171	0.000205355	0	0.00975418	0	0	0.000429994	0	0	0	0.000203502	0	0	0.00170531	0.000173754	0.000130194	0	5.58012e-05	0	0	0	0	0.00165518	0.0014248	0.00442114	0	0.0017435	0.0024353	0.00912676	0.00248846	0	0	0	0	0	4.21225e-05	0	7.04314e-05	0.00187644	4.84823e-05	0	0
M30	0.540378	0	0.00362417	0	0	0	0.000488852	0	0.00207242	0.0129956	0.0049142	0.0082358	0	0	0.0103854	0	0	0.000469524	0.000316887	0	0.00172566	0.00087774	0	0.0104666	0	0.00261472	0	0	0.00762522	0.0014704	0.000412388	7.25259e-05	0.0106187	0	0	0	0	0	0	0	0	0.00473422	0.000115594	0.00172203	4.49813e-05	0	3.94589e-05	0.0140184	0
M31	0.623934	0.0197898	0	0	0.0038966	0.00780554	0.00643095	0.00669345	0.00594541	0.00280834	0.0021291	0	0	0	0.00452128	0	0	0.00257487	0.00552088	0	0.000153564	0.0001123	0.0104219	0	0.00294207	0.00257373	0.00868686	0	0	0	0.00422237	0.000827487	0	0.00583727	0	0	0	0	0	0.00341012	0	0.00199173	0.00772838	0	0	0	0.00666516	0.00205486	0
M32	0.566498	0	0.00844329	0	0.0032672	0	0.00444892	0	0	0.00586904	0	0	0	0	0	0.00827481	0.0107448	0	0.00217541	0.000656725	0.000224197	5.44025e-05	0	0	0	0	0	0	0	0	0	0.00015624	0.00251265	0.00578507	0	0.00166438	0.0093173	0.00262884	0	0	0	0	0.000708382	0	0.00104462	0	3.79879e-05	0.00592487	0.000735772
M33	0.600613	0.0111518	0.00306685	0	0.00279267	0	0	0	0.00460128	0	0	0	0.0163884	0.000212792	0	0.00555974	0	0	0.00437405	0.00170715	4.25833e-05	0	0.00497607	0	0	0	0	0	0	0	0.00012535	8.92999e-05	0	0	0	0	0.000534276	0	0	0.000869188	0	0	0	0	0	0	0.000478236	0	0
M34	0.579691	0	0	0.00682275	0.00292855	0.0119625	3.19706e-05	0	0	0	0.00606173	0	0.0111071	0	0	0	0	0	0	0	0	0.00333639	0	0	0.0167675	0.000303506	0.0043911	0	0	0	0.0025324	0.000505969	0	0	0.00244142	0	0	0	0	0.000141298	0	0.000690574	0	0	0.000133587	0	0.000418109	0	0
M35	0.593417	0	0	0	0.00274776	0	0.00366064	0	0	0	0.00429905	0	0	0.00273482	0	0	0	0.000752903	0.000837403	0	0	0.000180738	6.20039e-05	0.0105147	0	0.00135552	0	0	0	0	0.00177336	0.00328424	0	0	0	0	0	0	0	0.000296011	0	0	0.00342359	0	0.000170262	0	0.000369943	0	0.000231261
M36	0.590618	0	0	0.00777845	0.00319552	0.00916918	0.0021102	0.0108041	0.0051537	0	0.000686962	0	0	0.000118814	0	0	0	0.00130803	0.00217627	0.0148357	0	3.17387e-05	0	0	0	0.000109742	0.0159272	0	0	0	0	0.00082848	0	0.000556785	0	0	8.21983e-05	0	0.000303536	0	0	0	0.00212587	0	0	0.0042659	0.0003808	0	0
M37	0.592217	0.016987	0	0	0.00016661	0	4.79456e-05	0	0	0	9.78732e-05	0	0	0.0135639	0	0	0	0.0015444	0.000349313	0	0	0	0	0	0	0	0.00184602	0	0	0.0120911	0.00307353	0.00113059	0	0.00339547	0	0	0	0	0	0.000655595	0	5.1097e-05	0.000102982	0	0.000326491	0	0.000310607	0	0
M38	0.599813	0	0.00948655	0.00975432	0.00353481	0	0.0060225	0.0138712	0	0.0107703	0	0	0.00336484	0	0	0.00657354	0	0.00262768	0.00241473	0	6.12147e-05	0	0	0	0	0.00352895	0	0	0	0	0.000706385	0.000521074	0	7.51202e-05	0.0016391	0	0	0	0	0.00426033	0	0.0102426	8.13003e-05	0	4.37853e-05	0	0.00166811	0	0.000269858
M39	0.555837	0	0.00866207	0	0.00283432	0	0.00284279	0	0	0.000912778	0	0.0106713	0	0	0	0	0	0.00159518	0.00060653	0	0	0.0119007	0	0	0.000271992	0	0	0	0	0	0.00700262	0.00284352	0	0	0.00381653	0	0.00578369	0	0	0.000602543	0	0	3.07023e-05	0	0	0.00059904	0.000573567	0.00224495	0.0077507
M40	0.619003	0	0.00684393	0	0.00235641	0	0	0	0.00889045	0	0.000306427	0.00180463	0	0.000897332	0	0.00956889	0.0149574	0.0011159	7.93329e-05	0	0	0	0.00858291	0	0	0.00314508	0	0	0.00443384	0	0	5.20235e-05	0.00616642	0	0.00817629	0.0119573	0	0	0	0	0	0.00101251	4.66622e-05	0	0	0	0.000654087	0	0
M41	0.617537	0.00168748	0.000696556	0.0119	0.00332629	0	0	0	0.00381149	0	0.000756305	8.49059e-05	0	0	0.0123128	0	0	0	0.000195711	0	0	5.4303e-05	0	0	0.0137387	0	0	0	0	0	0	0.00123387	0	0	0	0	0	0.00498199	0	0	0.00347828	0.00655685	7.19871e-05	0.00371303	0	0	0.000335357	0	0.0144664
M42	0.613673	0	0	0.00583583	0.000804581	0	0.0113576	0.00410884	0	0	0	0	0	6.85982e-05	0	0	0	0.00320633	0.00102139	0.0136701	0.0121992	0.00232763	0	0	0.00186569	0	0	0	0	0	0	0.000477326	0	0	0	0	0	0	0.000123799	0.00102384	0	0	0.00273869	0	0	0.000444646	0.000725639	0	0
M43	0.640592	0	0.000895588	0	0.00369469	0	0.00250222	0	0.00558873	0.00848647	0	0	0	0.000265326	0.00653775	0.00154644	0	0	0.00103398	0	0	0	0	0	0	0.00723272	0	0	0.0121368	0	0	0.000950642	0.000211938	0	0	0	0.000672306	0	0.0134125	0.000211221	0	0.0051336	0.00154862	0.00227229	0.000185856	0	0.000609181	0.000418569	0
M44	0.587287	0	0.0113791	0.0143481	0.0027143	0	0	0	0	0.0188922	0.00294945	0	0	0.00651701	0.0064252	0.00237209	0	0.000286719	0	0	0.00233416	0.00382931	0	0	0	0.000112789	8.43842e-05	0	0	0.00595619	0.000159062	0.000535677	0	0.000213764	0	0	0.000282516	0	0	0	0	0.00128559	6.22697e-05	0	0.00154246	0.00119941	0.00136631	0	0
M45	0.580757	0	0.00432644	0.00501529	0.000442662	0	0.014603	0	0	0	0.00425183	0.00415965	0	0.0052686	0	0	0	0.0032699	0.00807509	0	0.0207839	0.000719282	0	0	0	0	0	0	0.00555264	0	0.00238782	0	0	0.00185354	0	0	0.00402471	0	0	0	0	0	0	0	0.00142454	0	0.000345963	0.000445562	0.00412428
M46	0.511461	0.00504387	0.00221895	0	0.00293484	0	8.39169e-05	0	0.000323011	0	0	0.00291859	0	0.000143167	0	0.000516051	0	7.24083e-05	0	0.00479522	0	0	0.000513525	0.00519808	0.000102837	0	0	0	0	0	0.00139596	0.000902659	0	0.0030772	0	0	0	0	0	0.000599026	0.00882591	5.46932e-05	5.68624e-05	0	0	0.00168573	0.00027532	0	0
M47	0.645922	0	0	0.00305058	0.00254829	0	0.000379478	0	0.00537363	0	0	0	0	0	0.00317082	0	0	9.72043e-05	0.0017316	0	0	0.000782743	0.00902744	0	0	0.000686072	0	0.000668818	0	0	0.00035484	0	0	0	0	0	0	0	0	0	0	0	4.36803e-05	0.003423	0	0.00296284	0.00020083	0.00833262	0
M48	0.581956	0.00943292	0.000822438	0	0.00542629	0.0132816	0.00296495	0	0.00106796	0	0.00538673	0	0.000968854	0.0111623	0	0	0	0.00564965	0.00228847	0.00804678	0	0.00208656	0	0	0	5.39653e-05	0.007856	0.00506741	0	0.00209927	0.00241738	0.00148365	0	0.00505601	0	0	0.000815058	0	0	0.000398274	0	5.11851e-05	0	0	0	0	0.000539925	0	0
M49	0.616205	0	0	0.00370116	0.00124218	0	0.0123725	0	0	0.000518164	0	0	0	0	0.00725699	0.00265908	0.00348325	0.00191616	0	0	0	0.00241844	0	0	0.0139678	0	0	0.00727508	0	0	0.000304984	0.00112641	0	0.000307156	0	0	0	0.0113038	0	0	0	0	3.5152e-05	0	0	0.00418589	0.00108327	3.94042e-05	0
M50	0.614472	0	0.00468615	0.00388485	0.00372796	0	0.00462058	0	0.00251618	0	0	0	0	0.00212018	0	0	0	0.00875136	0.00246317	0	0	0.007765	0	0	0	0.0010326	0	0	0	0.00512197	0	0.000732397	0	0	0	0	0	0	0.000100819	0.00150882	0	0	0.000865157	0	0.000235224	0.000133125	0.00179144	0	0
[truncated: 952 more columns]

## Sheet: Table_S2
Table_S2. The metastasis marker genes (MGs) determined by empiricaly P value
EP: empirical P value
MS: metastasis score
EP < 0.001	# of MGs: 54
EP < 0.005	# of MGs: 202
EP < 0.01	# of MGs: 357
	MS	EP
ZNF676	0.123038	0
FAM163B	0.0936314	0
LDOC1	0.0878362	0
FAM78B	0.0874894	0
IRF1	0.086791	0
SLFNL1	0.0808985	1.1588e-05
CHRNA5	0.0795127	1.1588e-05
STK40	0.0776414	1.1588e-05
MISP	0.0673326	2.31759e-05
SPPL2C	0.063177	3.47639e-05
TMPRSS5	0.0629985	3.47639e-05
GRB7	0.0609505	4.05578e-05
CCDC93	0.0573294	6.37338e-05
CLDN4	0.0534201	8.11157e-05
LINGO3	0.0525076	8.11157e-05
CERS4	0.0487428	0.000104292
CTXND1	0.0468014	0.000127468
PLK2	0.0453458	0.000133261
ZBED3	0.0426736	0.000185407
ALOXE3	0.041407	0.000202789
RGS4	0.0412201	0.000202789
PLSCR2	0.0409605	0.000208583
FAM193A	0.0380486	0.000260729
EGR2	0.0372157	0.000272317
GSTM5	0.0367617	0.000283905
OTOGL	0.0357936	0.000318669
SPTSSA	0.0342221	0.000376609
ESRP2	0.0335103	0.000411372
BSPRY	0.0332182	0.000411372
SOX15	0.0331173	0.000428754
KRT13	0.0328728	0.000440342
VCPKMT	0.0327594	0.00045193
SLC28A1	0.0326183	0.000457724
BTBD8	0.0321704	0.000469312
SLC16A1	0.0311381	0.000544634
C4orf45	0.0308364	0.000562016
GOLM1	0.0307737	0.000562016
IFT80	0.0300722	0.000590986
TAF8	0.029309	0.000619956
KCNQ5	0.0292812	0.000619956
KRT4	0.0284032	0.000689483
FBLN7	0.0283851	0.000689483
SEMA4D	0.0280109	0.000712659
PTGS2	0.0279758	0.000718453
EXOSC10	0.0276942	0.000747423
H2BU1	0.0273251	0.000764805
GAP43	0.0270622	0.000787981
FOXC2	0.0269218	0.000805363
RNF223	0.0266666	0.000822745
LSM1	0.0265532	0.000828539
TNFRSF11A	0.0258254	0.000892273
SH3BGRL	0.0250922	0.000938624
PNMT	0.0243399	0.00099077
HOPX	0.024314	0.000996564
KRT24	0.0241457	0.00101395
OR52E8	0.0236033	0.00108927
ALOX12B	0.0235519	0.00110665
SNX9	0.0233756	0.00112983
SH2D3A	0.0233495	0.00114141
IGLON5	0.0231992	0.00116459
CCDC138	0.0231	0.00117618
TRIM32	0.0230493	0.00118777
WFDC2	0.0225819	0.00129785
THRSP	0.0225732	0.00129785
LDB3	0.0225516	0.00130364
RTRAF	0.0222587	0.00135579
SRD5A3	0.0221599	0.00136738
RHBG	0.0219717	0.00141373
FAT1	0.0219151	0.00142532
TM2D2	0.021773	0.00144849
RND1	0.0217675	0.00144849
HS3ST6	0.0213434	0.00148905
AZGP1	0.0212517	0.00149485
GRIFIN	0.0211303	0.00151223
SRCIN1	0.0207747	0.00156437
CORO2B	0.0206247	0.00159334
GK	0.0205557	0.00161073
ELAVL1	0.0205291	0.0016339
EGLN2	0.0205271	0.0016397
JAG1	0.0202614	0.00171502
QPCT	0.0202078	0.00172661
DDX43	0.0201705	0.0017324
KRT9	0.0199991	0.00174399
CAAP1	0.0198265	0.00178455
CACNG4	0.019681	0.00181931
SRP14	0.0196637	0.00181931
KRT23	0.0195306	0.00185987
A4GNT	0.0194796	0.00186566
VIT	0.0188852	0.00200472
TSKS	0.0186923	0.00205686
PTGDR2	0.0185806	0.00210901
MMP9	0.0184936	0.00212639
JAM2	0.0183908	0.00217274
JUP	0.0182356	0.00222489
TEX52	0.0181712	0.00225386
PPFIA4	0.0180927	0.00228283
ISLR2	0.0180877	0.00228283
RASGRF1	0.0180018	0.00231759
KLLN	0.0177177	0.00241609
AMBP	0.0176678	0.00242768
CDK15	0.0175763	0.00245665
FAM177A1	0.0175504	0.00246244
CCDC28A	0.0175355	0.00247982
NPW	0.017482	0.00250879
SLC22A14	0.0174767	0.00250879
CH25H	0.017464	0.00250879
TXLNA	0.0173694	0.00256673
SCGB1D2	0.0173296	0.0025957
WTAP	0.0171586	0.00263047
PAX5	0.0171132	0.00264205
PLLP	0.0170421	0.00268261
C11orf80	0.0170389	0.00268261
TPK1	0.016964	0.00274055
ARL17B	0.0168914	0.00278111
NEK10	0.0167991	0.0027869
ABCA1	0.0167745	0.0027869
NPEPPS	0.0167125	0.00281008
NRG4	0.016712	0.00281008
GHRH	0.0166758	0.00281587
H3-3B	0.0166385	0.00283326
KRT38	0.016625	0.00284484
CASQ2	0.0165575	0.00285643
CNGA4	0.0165501	0.00286223
F2R	0.0164165	0.00293755
GCNT4	0.0164143	0.00293755
ZFY	0.0164055	0.00293755
PRB2	0.0162978	0.0029781
MAB21L1	0.0162801	0.00298969
PTH2R	0.0162443	0.00301287
C3orf80	0.0162426	0.00301287
LAMP5	0.0161581	0.00306501
HR	0.0161353	0.00309398
GBP3	0.015973	0.00319248
PLA2G4C	0.0158827	0.00325042
ALPK1	0.0157881	0.00328519
FOLR1	0.0157429	0.00330836
NUTM2E	0.0156859	0.00333733
TAS2R7	0.0155583	0.00338948
COX6B2	0.0155297	0.00339527
CCL21	0.0155198	0.00340106
DOLK	0.0155134	0.00340106
DBNDD2	0.0154893	0.00341845
PLOD2	0.0154557	0.00345321
COL6A5	0.0154243	0.003459
H2AC17	0.0154218	0.003459
KCNJ3	0.015395	0.0034648
UBP1	0.015383	0.00347639
ARHGDIB	0.0153703	0.00347639
PHF21B	0.0153628	0.00348797
FARS2	0.0153587	0.00348797
ARHGEF35	0.0153525	0.00349377
GPR12	0.0153135	0.00351115
EIPR1	0.0153129	0.00351115
NRBP1	0.0152027	0.00358647
GDF6	0.0151069	0.003656
FAH	0.0149804	0.00374291
ZDHHC11B	0.01495	0.00378347
ESM1	0.0149319	0.00380664
KRT79	0.0149233	0.00381244
CLEC5A	0.0149131	0.00381823
XCL1	0.0148692	0.00384141
GPLD1	0.0148672	0.00384141
OR7D2	0.0148358	0.003853
UAP1	0.0147709	0.00388197
CPEB1	0.0147408	0.00389355
PGBD1	0.0145845	0.00402102
IRF6	0.0145281	0.00406737
WNT7A	0.0145064	0.00409634
MOGAT1	0.0144935	0.00409634
FGFR1	0.014464	0.00411952
PWWP3A	0.0144104	0.00418325
WT1	0.0144046	0.00418905
FUT4	0.0143457	0.00421802
MYL2	0.0143377	0.00422381
FAM171A2	0.0143311	0.00422381
NLRP1	0.0143101	0.00424119
KCNK12	0.0142937	0.00425278
PAK1	0.0142801	0.00425857
ASPHD1	0.0142488	0.00426437
FMO1	0.0142452	0.00427016
ADGRG1	0.0142179	0.00429913
AC090517.4	0.0141954	0.00431651
LRRC63	0.0140645	0.0044266
PIWIL2	0.0140515	0.00443819
AL162231.1	0.0140321	0.00444977
IBSP	0.0139943	0.00449033
ZNF799	0.0139609	0.00451351
NAP1L3	0.0138485	0.0046178
FUT9	0.0138249	0.00466415
ATP6AP1L	0.0138211	0.00466415
ACVR1C	0.0137784	0.00469312
TESMIN	0.013772	0.00469312
STEAP4	0.0137679	0.00469892
SNRPD1	0.0137177	0.00474527
CAMK1G	0.0136603	0.00479741
ZNF592	0.0136596	0.00479741
PRR4	0.0135763	0.00488432
ILDR2	0.013555	0.00489591
RGS7	0.0135441	0.00489591
DUSP1	0.0135434	0.00489591
CYP4B1	0.013537	0.00490171
HSD17B8	0.0134977	0.00495385
LRRN4	0.0134427	0.005006
LMX1A	0.0134282	0.00501179
RPS6KA2	0.0134136	0.00502917
FYB2	0.0134017	0.00503497
LARP7	0.0133877	0.00505235
ZNF684	0.0133818	0.00505235
ENC1	0.0133342	0.00511608
MAPT	0.0133123	0.00512767
FAM72D	0.0133076	0.00513926
VAMP8	0.0133035	0.00513926
IGSF21	0.0132212	0.00520879
UTS2B	0.0131782	0.00524355
ARF6	0.0131271	0.0052899
NPRL2	0.0131103	0.0052957
ZMYND11	0.0130991	0.00530728
NPIPB12	0.0130748	0.00533625
CRYBG3	0.0130539	0.00534784
DAAM1	0.0130457	0.00536522
CHAC1	0.013011	0.00543475
INMT	0.012973	0.00546372
ZNF789	0.0129584	0.00549269
TRMT10B	0.0129216	0.00555063
KLRF2	0.0129	0.00556801
SVEP1	0.0128452	0.00563754
FGF18	0.0127912	0.00571286
CIB2	0.0127809	0.00573024
CHST6	0.0127418	0.00578239
TRAPPC5	0.0127392	0.00578818
CHGA	0.0127344	0.00578818
HAUS1	0.0127094	0.00582295
ERGIC2	0.0127067	0.00582874
GAPDHS	0.0126943	0.00584612
FGD6	0.0126536	0.00590406
ABCA4	0.0126447	0.00593303
RFX3	0.0126389	0.00593883
DENND5A	0.0126043	0.00599097
ESX1	0.0125939	0.00600835
HOXD11	0.0125368	0.00606629
PLPP6	0.0125195	0.00607209
CAV2	0.0124246	0.00618797
SLC24A3	0.0123734	0.0062517
C11orf68	0.0123716	0.0062517
CCDC179	0.012319	0.00632123
ZNF207	0.0122949	0.00637917
MYBPC1	0.0122676	0.00639076
MAB21L4	0.0122574	0.00641973
SAMD13	0.0122416	0.00643132
SERPIND1	0.0122252	0.00645449
MCFD2	0.0122046	0.00648926
ARHGAP1	0.0121625	0.0065414
ZNF410	0.0121254	0.00662252
MPDU1	0.0121035	0.00664569
WDR27	0.0120483	0.00672681
EEF2K	0.0120474	0.0067326
LAGE3	0.0120321	0.00674998
EYA2	0.0120192	0.00676737
GOLGA7	0.011985	0.00681372
SUSD2	0.0119354	0.00690063
HLA-DRA	0.0119335	0.00690642
NLRP2	0.011923	0.00691222
ZNF17	0.011914	0.00691801
COPS7A	0.0118995	0.0069296
OSBPL2	0.0118929	0.00694698
LRRC69	0.0118916	0.00694698
HPX	0.0118769	0.00697595
CLCNKA	0.0118237	0.00708024
FGF2	0.0118011	0.00710342
ARMCX2	0.0117936	0.0071208
WDR17	0.0117693	0.00716715
NR2F2	0.0117408	0.00720191
PCDHAC1	0.0117185	0.00723668
OPCML	0.0117053	0.00724827
MYO1A	0.0116437	0.00738732
CCDC60	0.0116344	0.0074047
LMO4	0.0116093	0.00746264
ALDH8A1	0.0115915	0.00748003
CD1A	0.0115871	0.00748003
SLC6A6	0.0115666	0.00754376
TSC2	0.0115424	0.00758432
BLVRA	0.0115364	0.00759011
SORCS3	0.0115321	0.0076017
INO80C	0.0115149	0.00763646
CENPQ	0.0115013	0.00765384
DPM2	0.0114842	0.0076944
TENT5B	0.0114762	0.00771178
HAPLN1	0.0114604	0.00772917
BAMBI	0.0114575	0.00773496
ASIC2	0.0114361	0.00776972
GRB10	0.0114265	0.00776972
CCBE1	0.0113591	0.0078914
MED27	0.0113567	0.0078914
GLT8D1	0.0113364	0.00792037
TRPV5	0.0113252	0.00794934
PCDHA8	0.011299	0.00800728
CRB2	0.0112937	0.00803045
DPH6	0.0112698	0.00811157
DLX2	0.0112678	0.00812316
WEE2	0.0112147	0.00822165
PLXNA3	0.0112091	0.00822165
P4HA1	0.0111768	0.00829698
RSPH4A	0.0111738	0.00829698
SLC39A14	0.0111653	0.00832015
THPO	0.0111649	0.00832015
BRF2	0.0111638	0.00832595
ADH1C	0.0111638	0.00832595
ENTPD7	0.0111335	0.00840127
TUT4	0.0111308	0.00840127
NCKAP5	0.011118	0.00843024
NOC4L	0.0110982	0.00847659
SMAP2	0.0110932	0.00848238
UBL5	0.0110741	0.00851715
KCNN2	0.011073	0.00852874
OR52D1	0.0110684	0.00854032
LEF1	0.0110515	0.00857509
HOXA13	0.011007	0.00867938
GPR161	0.0109828	0.00872573
CMAS	0.0109134	0.00880685
ADRA1A	0.0108923	0.00883582
MMP10	0.0108592	0.00888796
PTGIS	0.0108475	0.00891114
ZNF233	0.0108456	0.00891693
ZSCAN20	0.0108364	0.00893431
STRBP	0.0108148	0.00899225
KRT37	0.0108122	0.00899805
CEP164	0.0107949	0.00902702
PCDHGA7	0.0107676	0.00911393
CPS1	0.0107485	0.00915448
STRA6	0.0107389	0.00916607
PLGLB2	0.0107156	0.00918345
INKA2	0.0106796	0.00926457
ASB12	0.0106436	0.00938045
CCDC106	0.0106314	0.0094326
NCOR1	0.0106297	0.00943839
MGAT2	0.0106284	0.00944418
TUSC1	0.0106247	0.00944418
HDAC1	0.0106201	0.00944998
GPR158	0.0106132	0.00946736
SLC20A2	0.0106097	0.00948474
NUDT7	0.0106003	0.00949054
ZNF200	0.0105991	0.00949054
MED8	0.0105933	0.00950792
KCTD10	0.0105859	0.00953109
DPY19L3	0.0105552	0.0096238
UNC93B1	0.0105431	0.00964118
CEND1	0.0105273	0.00967594
ACADM	0.0105109	0.0097165
MED29	0.0105067	0.00973388
TMEM31	0.0105019	0.00974547
MMRN1	0.0104832	0.00978603
BIK	0.0104668	0.00983238
MAP3K7	0.0104581	0.00987873
ART3	0.0104542	0.00989032
FAM163A	0.0104399	0.00994247
HSD17B7	0.0104398	0.00994247
HOXA4	0.0104195	0.00997723

## Sheet: Table_S3
Table_S3. lists of metastasis associated genes provided by each of TMMGdb, GMGene, HCMDB database
TMMGdb (Entrez ID)	CMGene (Symbol)	HCMDB (Symbol)
7818	CXCR4	AAMP
596	CDH1	ABCA2
64866	NME1	ABCB1
5266	ERBB2	ABCC5
4170	MMP9	ABCG2
6935	VEGFA	ABI1
5464	VEGFC	ABI2
5540	KRAS	ABL1
100996758	EGFR	ABL2
5166	CD82	ACE
2064	BRAF	ACE2
7184	MMP2	ACKR1
150094	BRMS1	ACKR2
6794	HIF1A	ACKR3
6387	CD44	ACOT8
7852	TP53	ACP5
9564	CXCL12	ACTA2
1236	PTGS2	ACTB
6366	TGFB1	ACTL6A
998	TMEM140	ACTN4
718	SPP1	ACTR2
6774	TWIST1	ACTR3
4318	EZR	ACVR1C
11278	CTNNB1	ADAM10
4313	PEBP1	ADAM12
468	PTEN	ADAM15
3162	S100A4	ADAM17
2551	MET	ADAM23
4780	ITGB1	ADAM28
406991	HPSE	ADAM8
27250	STAT3	ADAM9
3576	BIRC5	ADAMTS1
50507	BSG	ADAMTS13
84557	NFKB1	ADAMTS18
5329	MUC1	ADGRE5
5054	KISS1	ADGRF5
977	MMP7	ADGRG1
10642	TIAM1	ADGRL3
81502	PIK3CA	ADIPOQ
196294	FIGF	ADM
81030	SNAI1	ADORA2B
29072	MMP1	ADRB2
4088	ESR1	AFAP1-AS1
2525	MTA1	AFAP1L1
11226	CXCL8	AFAP1L2
6487	IGF1R	AFDN
4316	CCR7	AFP
2651	PROM1	AGER
7040	RECK	AGO1
5321	PTK2	AGO2
10524	AKT1	AGO4
4325	PTP4A3	AGR2
4323	SNAI2	AGR3
4087	RAC1	AGT
4435	TIMP1	AGTR1
3673	MMP14	AGTR2
442918	ITGAV	AHR
4326	EZH2	AIFM1
84560	RHOC	AJUBA
7249	RHOA	AKAP12
2315	MTSS1	AKR1C2
388015	ZEB1	AKR1C3
5077	IL6	AKT1
6999	NDRG1	AKT2
3910	MTDH	AKT3
94234	CAV1	ALCAM
4675	CCND1	ALDH1A1
960	HGF	ALDH1A3
6615	FLT4	ALDH3A1
3875	PDPN	ALDH7A1
3880	PTHLH	ALDOA
8842	CDKN2A	ALK
3308	SRC	ALOX15
1374	MKI67	ALOX5
2665	SMAD4	ALPL
4881	MIR21	ALPP
948	ITGB3	ALYREF
3689	F2R	AMACR
4804	HOTAIR	AMBP
102	CDH2	AMFR
7189	CD9	AMOT
3688	TP63	ANGPT1
5290	TNFSF11	ANGPT2
5291	VIM	ANGPTL2
5293	TGM2	ANGPTL4
5294	SELE	ANGPTL6
7076	BCL2	ANKRD12
8737	SERPINB5	ANO1
192111	NOTCH1	ANO9
1111	NME2	ANOS1
11200	MYC	ANTXR1
3569	MME	ANXA1
3558	KIT	ANXA2
6318	ITGA5	ANXA2R
6317	ICAM1	ANXA3
9429	ACKR3	ANXA4
3717	NTRK2	ANXA7
2323	MTOR	APAF1
2322	TNF	APBA2
2309	TIMP2	APC
285	SATB1	APEX1
9474	MAPK1	API5
4851	PLAUR	APMAP
5209	ABCB1	APOBEC3G
5175	LOX	APOM
1543	LGALS3	AQP1
55818	L1CAM	AQP3
2113	KDR	AQP5
1969	AR	AQP8
3984	ID1	AR
23452	HMGB1	ARF6
7092	GLI1	ARG1
11259	GJA1	ARHGAP35
9355	GATA3	ARHGAP5
6885	F3	ARHGDIA
7182	HTATIP2	ARHGDIB
11035	AGR2	ARHGEF1
4194	CDKN1B	ARHGEF2
4193	CA9	ARHGEF39
7133	SOX2	ARID1A
8091	CDCP1	ARID4A
6352	BMI1	ARID4B
7412	MAPK3	ARL2BP
53353	PLAU	ARL6IP5
2247	MIR10B	ARMC8
4054	ITGA6	ARNT
4322	FAS	ARNTL
5894	FLT1	ARRB1
4312	FOXM1	ARTN
4314	ESR2	ASAP1
4319	ENG	ASCL2
5594	CRP	ASPN
2353	CEACAM5	ASS1
2354	ZEB2	ATAD2
3725	PAX8	ATF3
3726	TGFBR2	ATF4
3727	BRCA1	ATG10
22914	SP1	ATM
7048	MAP2K4	ATP11A
2621	RELA	ATP2A3
2118	RB1	ATP5B
1435	MDM2	ATP6V1C1
6776	EPCAM	ATPIF1
6777	ARHGDIB	AURKA
1277	ARHGDIA	AURKB
51129	STMN1	AUTS2
5747	ANXA1	AXIN2
1026	SFN	AXL
9338	GPC3	B2M
27065	ALK	B3GAT1
644914	FN1	B3GNT3
10298	CTNND1	B3GNT7
3146	POSTN	B3GNT8
6275	CD24	B4GALT1
6347	TNFRSF11A	B4GALT3
79727	RUNX2	BAD
3565	CASP8	BAG1
3586	TFPI2	BAG2
1555	VCAM1	BAG3
51151	THBS1	BAIAP2
4790	TERT	BAK1
4791	SYK	BAP1
4089	SDCBP	BAX
4739	PRKCI	BAZ2A
1956	PDGFRA	BBC3
6548	SERPINE1	BCAM
166	MUC4	BCAR1
2051	MMP13	BCAR4
64283	MCAM	BCAT1
2909	SMAD3	BCL2
1436	MIR145	BCL2L1
2065	ILK	BCL2L11
925	IGFBP3	BCL2L12
7010	IGF1	BCL2L2
54345	IBSP	BCL9
5629	HMGA1	BDKRB2
4360	ANXA2	BDNF
54566	CERS2	BECN1
7113	ERCC1	BGN
5362	CTTN	BIN1
3169	CTGF	BIRC2
3161	IGF2BP3	BIRC3
3320	ABCG2	BIRC5
2115	PTTG1	BIRC7
60681	CLDN1	BLACAT1
219970	HMGA2	BMI1
5743	BIRC7	BMP1
4513	NKX2-1	BMP2
3223	SHH	BMP4
4821	SDHB	BMP5
1769	CCL2	BMP6
8644	ROCK1	BMP7
7291	PXN	BNIP3
2289	PSMD10	BRAF
3791	B2M	BRCA1
2253	POU5F1	BRCA2
3927	PGR	BRD7
254827	FOXP3	BRMS1
2346	PAX2	BRS3
10551	TNFRSF11B	BSG
10417	MMP3	BST2
1326	MITF	BTG1
1524	MIR200A	BVES
6376	LOXL2	C14orf166
51393	KRT19	C1QA
1785	MALAT1	C1QBP
5585	ITGB4	C6orf106
84432	ITGA3	CA1
9043	FASLG	CA2
2002	CYR61	CA9
3853	MACC1	CACUL1
5122	ERBB3	CACYBP
7832	EPAS1	CADM1
10120	EPHA2	CALCA
57332	NEWENTRY	CALR
984	EDN1	CALU
23097	CTSB	CAMP
3397	MAPK14	CANX
2852	CHGA	CAP1
729230	CDX2	CAPG
10401	SLIT2	CAPNS1
6605	KLF4	CARD10
5734	COL18A1	CARD9
728606	TYMS	CASP10
29843	TOP2A	CASP3
5879	TLR4	CASP8
2736	TIMP3	CASP9
23476	TGFBR1	CASS4
10481	TGFBI	CAT
29126	SOD2	CAV1
7070	SLC2A1	CBL
407026	TMPRSS4	CBLB
407040	AXL	CBR1
406933	KRT20	CBR3
5603	TMEM8B	CBR3-AS1
406940	PCNA	CBX4
4907	NEDD9	CBX5
2171	MST1R	CBX7
84624	MIR335	CBX8
5820	MIF	CCAR2
2335	MIR30A	CCDC88A
22908	MIR200C	CCDC88C
708	MIR143	CCL1
4904	MIR126	CCL14
442911	LGALS1	CCL18
406974	CXCR2	CCL19
8407	HSPB1	CCL2
79054	GSTM1	CCL21
26353	ANGPT2	CCL22
6046	DICER1	CCL3
8019	FOXO1	CCL5
83401	FGFR1	CCL7
6597	ALDH1A1	CCL8
7042	F2RL1	CCNA2
2252	ETV4	CCNB1
8660	EGF	CCNB2
3732	COL1A1	CCND1
928	CCR6	CCND2
958	YAP1	CCNG1
4288	DLC1	CCNG2
3606	CDKN1A	CCR1
5605	CDH17	CCR4
5297	AKAP12	CCR5
5074	BCAR1	CCR6
347745	MUC16	CCR7
4179	TNFRSF10B	CCR9
1604	WNT5A	CD109
966	UCHL1	CD14
9368	AURKA	CD151
3491	ST14	CD164
2260	SNCG	CD200
4771	BMP6	CD22
406885	SKP2	CD24
5058	BMP2	CD274
51651	SELP	CD276
864	CEACAM1	CD34
148252	S100A9	CD4
1432	S100A6	CD40
5868	RET	CD44
10181	NDRG2	CD47
3872	CCDC88A	CD55
57214	SERPINF1	CD63
6696	PDGFRB	CD74
3589	ANGPTL4	CD80
6273	PAK1	CD81
4217	NRAS	CD82
6667	MSN	CD9
30968	MMP8	CDC42
6093	MIR34A	CDC73
283349	MIR22	CDCA8
11186	MIR214	CDCP1
7849	MIR200B	CDH1
5079	MIR155	CDH11
4627	MIR141	CDH12
10398	MIR139	CDH13
4633	MIRLET7A1	CDH17
3091	LDHA	CDH2
2324	LASP1	CDH3
10016	KRT5	CDK1
10097	ARG1	CDK4
57379	IDO1	CDK5RAP3
10725	IL1B	CDK8
8572	IGFBP5	CDKN1A
4585	IGFBP2	CDKN1B
1954	HSPA5	CDKN2A
51534	GSTP1	CDKN2B-AS1
2876	GSK3B	CDX2
11156	CD274	CEACAM1
57007	DKK1	CEACAM3
9068	FCGR3A	CEACAM5
25950	ALCAM	CEACAM6
494324	AKT2	CEBPA
80314	ERG	CEBPB
1869	EIF4E	CEMIP
332	EGR1	CENPW
406935	TYMP	CERS2
50855	E2F1	CERS6
57402	DAPK1	CETN1
6271	CTSK	CFL1
6285	CTSD	CFTR
406892	VCAN	CHAF1B
3480	CREB1	CHD1L
406971	TWIST2	CHEK1
8614	PARK7	CHEK2
1366	WASF3	CHFR
7082	GNB2L1	CHGA
25816	ADAM10	CHI3L1
2012	CD151	CHRM3
9097	ADAMTS1	CHRNA4
148808	NAPSA	CHRNA7
25961	ROCK2	CHUK
650	EBAG9	CITED1
999	TNFRSF10A	CITED2
378938	ADAM9	CKS1B
51561	ADAM15	CLCA1
5473	BECN1	CLCA2
6374	RUNX3	CLCN3
3383	CASP3	CLDN1
9540	NCOA3	CLDN11
64975	VANGL1	CLDN16
286827	GPR68	CLDN18
11235	CD276	CLDN3
51136	PSCA	CLDN4
23410	XRCC1	CLDN5
6648	UMPS	CLDN7
94025	TTF1	CLEC1B
4005	TAGLN	CLEC2A
10276	BRCA2	CLEC4G
207	SPARC	CLEC4M
10507	FSCN1	CLIC1
9319	SIX1	CLIC3
1654	SDC1	CLIC4
6405	S100B	CLIP1
8828	S100A8	CLOCK
9260	S100A2	CLU
2050	RPS6KA3	CMTM3
3683	BCL2L1	CNBP
3684	RAD51	CNDP1
1573	MIR146B	CNR1
2919	RAB25	CNTN1
2920	PRKCZ	COL18A1
25855	PRKCA	COL1A1
5608	LAPTM4B	COL3A1
5595	PPARG	COL4A6
1612	TLR9	COPS3
8214	PLD2	CORO1C
9940	PKD1	COX2
4830	PIK3CG	CPE
5664	WWOX	CPEB2
7031	NT5E	CPEB4
338412	NOS2	CPNE3
126393	NME3	CR1
3309	DRG1	CRABP2
5604	ATF3	CREB1
9839	MYB	CREB3
406983	MMP11	CREB5
406984	MGMT	CREM
406985	SCGB2A2	CRIM1
27122	SMAD7	CRK
2321	MIR9-1	CRKL
694	MIR31	CRMP1
6927	MIR23B	CRNN
6932	MIR205	CRP
6513	MIR195	CRTC2
947	MIR182	CRYAB
346389	MIRLET7C	CSE1L
682	LGALS3BP	CSF1
1021	LEP	CSNK1A1
1027	LCN2	CSNK2A1
406989	LAMC2	CSNK2B
1728	KRT7	CSPG4
3303	ITGA4	CST3
3304	ITGA2	CST6
1268	IRS1	CSTA
1269	TNC	CT45A1
8727	HSP90AA1	CTAG1B
9235	XIAP	CTGF
5880	HRAS	CTHRC1
6662	APC	CTLA4
3384	HNF4A	CTNNA1
1365	CXCL2	CTNNA3
7020	CXCL1	CTNNAL1
8880	CXCR3	CTNNB1
3315	GJB1	CTNND1
7341	PELP1	CTNND2
9229	WWTR1	CTSB
10857	CADM1	CTSD
4321	FOS	CTSH
100133941	EPB41L3	CTSK
6502	FHIT	CTSL
2735	FGFR2	CTSS
2737	FAP	CTSZ
57144	EPHB2	CTTN
1958	EDNRB	CUL1
574447	ECM1	CUX1
2119	DSG3	CX3CR1
117581	DNMT3B	CXADR
9185	AFP	CXCL1
8493	ACE	CXCL10
7157	DCN	CXCL12
1029	PEBP4	CXCL14
115482713	CX3CR1	CXCL2
10406	CTSL	CXCL3
5100	CTAG1B	CXCL6
655	CST6	CXCL8
406937	PARP1	CXCR1
5460	CLDN4	CXCR2
642559	CLU	CXCR3
645682	LYVE1	CXCR4
6591	GNA13	CXCR5
55124	PAK4	CXCR6
57111	CDC42	CXXC4
406979	MAGEC1	CYB5R3
23314	IQSEC1	CYCS
407035	ADGRE5	CYLD
738	CD74	CYP19A1
208	PRDX6	CYP1A1
6772	CD40	CYP1B1
387103	FOXQ1	CYP2J2
3716	PIWIL1	CYP3A4
7297	NOG	CYP3A5
407053	AURKB	CYR61
406936	ARHGEF2	DAB2
7098	SOCS3	DAB2IP
3149	CCNG2	DACH1
81557	WNT3A	DACH2
1192	CCNB1	DACT2
3488	SPHK1	DAG1
9353	NRP2	DAPK1
57167	FADD	DDA1
55630	TNFRSF6B	DDB2
56159	TNFSF10	DDIT3
128209	LGR5	DDR1
1028	KISS1R	DDR2
996	PPAPDC1B	DEFB103B
406988	REG4	DEK
5163	JAM3	DEPDC1B
5601	BAP1	DEPTOR
5243	VMP1	DHFR
574452	ACTN4	DIABLO
81037	ADAM12	DIAPH1
3676	NANOG	DICER1
8829	YY1	DIRAS1
442906	YES1	DIRAS3
1398	WT1	DIXDC1
7965	TMSB4X	DKK1
9402	TMPRSS2	DKK3
10598	TLR2	DKK4
26073	C1QBP	DLC1
8795	THY1	DLEC1
11167	TGFB2	DLL1
3925	TGFA	DLL4
10859	TFF3	DLX4
406959	TFF1	DNAJA3
7430	TFAP2A	DNAJB4
407024	PRDX2	DNAJB6
5906	TDGF1	DNM2
27342	TCF7L2	DNMT3A
54386	MAP3K7	DNMT3B
7410	TAC1	DOCK1
1163	STK11	DOCK4
137529	STAT5B	DPEP1
10397	STAT1	DPP4
27035	SRD5A2	DPPA2
1015	SPINK1	DPYD
1233	SLPI	DPYSL3
6664	BMP4	DRG1
4495	ST6GAL1	DROSHA
6304	SFRP1	DSC3
1000	SEMA3F	DSG3
9475	CCL5	DUSP1
255877	SERPINB4	DUSP6
219541	SAA1	DVL2
3916	ROBO1	E2F1
2833	RARB	E2F3
4283	RAN	EBAG9
3627	RALB	ECE1
2049	RALA	ECE2
23493	RAB27B	ECM1
57801	RAB5A	ECT2
390992	BAX	EDN1
3316	PTPN13	EDNRA
22887	PTPN11	EDNRB
29128	PREX1	EFEMP1
574038	MIR503	EFNB1
406914	MIR497	EFNB2
6720	PTCH1	EGF
857	EIF5A2	EGFL7
2185	KLK6	EGFR
406986	PROX1	EGLN3
554213	UGT1A1	EGR1
9252	PODXL	EGR3
23089	ACP5	EHD2
407004	FXYD5	EHMT2
1022	PLG	EIF1AX
1488	PLA2G2A	EIF3I
28996	PKM	EIF4B
1370	PIP	EIF4E
23017	PHB	EIF4EBP1
81537	PFN1	EIF5A2
407018	PER1	EIF6
79626	PECAM1	ELAVL1
23650	PDGFB	ELAVL4
3561	LIMA1	ELF1
8883	TNFRSF12A	ELF5
995	CLEC1B	ELK3
9306	LEF1	ELMO1
652995	ASAP1	EMP1
102723099	DDR2	EMP3
54567	NTRK1	EMSY
1827	YBX1	ENAH
80204	NKX3-1	ENG
9314	NGFR	ENO1
27123	ATM	ENO2
51162	MYCN	ENPP1
10894	MSI1	ENPP2
283131	MIR340	ENTPD1
54739	MIR151A	EP300
79679	MIR133B	EPAS1
623	MMP17	EPB41L3
624	MMP15	EPC1
100126343	MMP10	EPCAM
1871	MLH1	EPHA1
7512	SMAD2	EPHA10
22846	MIR7-1	EPHA2
26121	MIR29C	EPHA4
406901	MIR223	EPHA7
6868	MIR221	EPHB1
6278	TACSTD2	EPHB2
55000	MIR210	EPHB3
285987	MIR206	EPHB4
100642175	MIR204	EPO
81848	MIR203A	EPOR
79441	MIR20A	EPS8
6732	MIR148A	EPSTI1
1977	MIR146A	ERAP1
2151	LRP5	ERAS
56288	LIMS1	ERBB2
5770	LGALS9	ERBB3
221883	LCP1	ERBB4
648	JUN	ERCC1
406948	IL18	EREG
554210	IL13RA2	ERG
6015	IL4	ERP29
6045	IL1A	ESAM
1410	IDH1	ESM1
56477	ID2	ESR1
503638	HSPD1	ESR2
5873	HOXC8	ESRP1
7879	FOXA1	ETS1
338382	HMOX1	ETS2
9148	HLA-G	ETV1
283460	STOML2	ETV4
406996	NRG1	ETV7
3036	ANXA3	EVI5
860	GSN	EVL
442920	MACROD1	EYA2
112597	GRN	EZH2
1452	GPER1	EZR
3848	AGO2	F11R
122011	LYPD3	F2
55384	LAMP3	F2R
1789	GJB2	F2RL1
8754	GHR	F3
3235	AMFR	F7
442919	FYN	FABP1
494331	FOLH1	FABP3
1978	SIRT1	FABP5
3172	FLOT2	FADD
100507347	FLNA	FAIM2
10761	PLXND1	FAM120A
1019	FOXO3	FAM134A
11169	RRP1B	FAM3B
2549	KDM1A	FANCD2
3577	PALLD	FAP
3579	FGFR4	FAS
5213	FGF2	FASLG
55294	FER	FASN
146713	FASN	FBLN5
100506046	PTK2B	FBN1
5729	ETS1	FBN2
3065	EPHB6	FBXO11
8841	ELAVL1	FBXW7
586	AHR	FCGRT
503569	HBEGF	FDFT1
10000	JAG1	FENDRR
100129597	DPP4	FER
100126315	AGER	FERMT1
7046	DLX4	FERMT2
55706	DACH1	FERMT3
983	CYLD	FGF1
990	CSE1L	FGF11
2023	CRMP1	FGF19
1953	CLDN7	FGF2
4440	CNTN1	FGF8
9289	CTHRC1	FGFBP1
407014	KLF8	FGFR1
407050	RASSF1	FGFR2
406958	CHI3L1	FGFR3
6659	NES	FGFR4
108353832	TXNIP	FGL2
894	ST6GALNAC2	FHIT
100507246	FBLN5	FHL2
571	CAP1	FILIP1
6939	G3BP1	FKBP5
4819	TRAP1	FLI1
8602	NUAK1	FLNA
89780	GAB2	FLOT1
728192	SEMA3E	FLOT2
10797	CD63	FLT1
6164	CHD1L	FLT4
3394	BAG3	FMNL2
1500	RASAL2	FMNL3
10950	MED23	FN1
84681	NTN1	FNDC3B
836	ADGRG1	FOLH1
91039	IL32	FOS
1803	MTA2	FOSB
4582	LGI1	FOSL1
442904	TMSB10	FOXA2
6334	SEMA5A	FOXC1
3690	CCNA2	FOXC2
80829	WISP2	FOXD3
406964	NRP1	FOXE1
113157	CD164	FOXF2
390205	TNFSF12	FOXJ1
406999	CBR3	FOXJ2
406968	CTNNAL1	FOXK1
7490	CBL	FOXL1
4303	IRS2	FOXM1
2296	SOCS1	FOXN3
972	STC2	FOXO1
920	TNS4	FOXO3
1234	RGS5	FOXO4
7528	CASP10	FOXP3
80177	LOXL4	FOXQ1
6657	CASP7	FPR2
100750225	NAA10	FRAT1
60674	CAPNS1	FSCN1
83752	CAPG	FSCN2
29034	CANX	FST
1373	MIA	FSTL1
57787	MAP1LC3B	FUBP1
3796	FOSL1	FURIN
2114	CDK5RAP3	FUS
406942	TBL1XR1	FXR1
3481	CALCA	FXYD3
406975	MAPKAP1	FXYD5
6470	PTP4A1	FYN
54474	DDR1	FZD2
400566	ZNF217	FZD7
10280	MZF1	G3BP1
100302187	YWHAZ	G3BP2
7465	YWHAE	G6PD
7168	WNT10B	GAB1
7471	VHL	GAB2
406906	VDR	GABRA3
3992	UBE2I	GADD45A
7169	TYR	GAL3ST2
6382	TYK2	GALNT3
57502	TPM3	GAS1
80054	TSPAN8	GAS5
287	TK1	GAS6
5524	TIMP4	GATA3
4853	TFF2	GATA4
84289	TMBIM6	GATA6
4131	BTG1	GBP2
23158	TBX3	GCNT1
7150	TACR1	GCNT2
7153	ADAM17	GDF15
4292	T	GDF2
4363	BST2	GDNF
4437	STC1	GEMIN2
7472	STAT6	GFRA1
8326	SSTR2	GGCT
8408	SRD5A1	GHITM
406946	SOX9	GHR
5655	SOX4	GHRL
366	BNIP3	GIT1
6478	SMARCE1	GJA1
6477	SMARCB1	GJB1
112399	SMARCA4	GJB2
10519	BMP7	GKN1
115908	SLC9A1	GKN2
406924	SLC3A2	GLG1
406947	SKIL	GLI1
6695	SMYD3	GLI2
84740	SHC1	GLI3
60312	CXCR5	GLRX3
2297	SDC4	GMNN
10694	CCL21	GNA12
23326	CCL18	GNA13
6176	SCN5A	GNAI1
10533	SERPINB3	GNB3
9140	MAPK12	GNPTG
22863	S100A11	GNRH2
8678	S100A10	GOLPH3
56848	S100A7	GPAT3
5777	BDNF	GPC3
11010	RXRA	GPC5
3479	RRM1	GPER1
23569	BCL3	GPI
3604	RDX	GPNMB
578	RBM3	GPR4
7456	ZNF350	GPR68
1017	ACTA2	GPR87
6091	RAF1	GPX1
27161	KIAA1524	GPX3
406899	PTK7	GRB2
7077	MTA3	GRB7
3621	MIR491	GRINA
406938	MIR409	GRM4
5861	MIR451A	GRN
56919	MIR363	GSC
834	S100A14	GSDMB
114548	PTGIS	GSK3B
6733	PTGER3	GSN
220930	PTGER1	GSTM1
5090	BAG1	GSTM3
599	PSAP	GSTP1
338773	HTRA1	GSTT1
253782	KLK7	GUSB
3217	PRL	GZMB
407021	MAP2K5	H19
7078	MAPK8	H2AFX
57504	MAPK7	HAMP
317	PRKDC	HAS1
89795	CHFR	HAX1
127841	MIR429	HBEGF
22943	LGR4	HDAC1
23133	PPP3CA	HDAC10
574441	PIWIL2	HDAC2
595	OCIAD1	HDAC4
3126	TRPM7	HDGF
8797	PPARD	HES1
80725	DLL4	HEY1
28987	PLK1	HGF
406994	PLD1	HIC1
159989	SPA17	HIF1A
7571	PGF	HIP1
5315	MAGEC2	HIST3H3
120224	SCARA3	HK1
3659	EGFL7	HK2
1848	ING4	HLA-E
56978	SERPINA5	HLA-G
4673	F11R	HMGA1
639	PAX7	HMGA2
10803	PAX5	HMGB1
6370	PAX3	HMMR
10213	IL22	HMOX1
4487	OSM	HNF1A
309	NTRK3	HNF1A-AS1
84959	NTF3	HNF4A
9077	NOTCH3	HNRNPA1
3280	NODAL	HNRNPAB
22880	NGF	HNRNPD
693200	NFATC1	HNRNPK
5347	CEACAM6	HNRNPM
3066	MYH9	HOMER1
387893	MYD88	HOPX
668	MUC6	HOTAIR
100126338	MUC5AC	HOXA1
27347	MUC2	HOXA5
2290	MTHFR	HOXA9
11178	MST1	HOXB13
9021	MSR1	HOXB5
407006	MSH2	HOXB7
8089	MMP16	HOXB9
406903	MMP12	HOXC8
641648	FOXO4	HOXD9
677775	MGAT5	HP
10085	MDK	HPN
7737	MCL1	HPSE
220	MC1R	HPSE2
493812	MAOA	HRAS
574034	MAL	HRC
5080	MARCKS	HRG
5925	ARRB1	HSF1
5753	TM4SF1	HSP90AA1
10626	MIR99A	HSP90AA2P
574495	MIR9-2	HSP90AB1
79961	MIR30B	HSP90B1
84844	MIR29A	HSPA4
101805488	MIR27A	HSPA5
100126319	MIR24-1	HSPA9
57468	MIR222	HSPB1
10746	MIR218-1	HSPB2
406962	MIR19A	HSPD1
10446	MIR183	HTATIP2
2146	MIR149	HTRA1
1385	MIR134	HTRA2
406961	MIR125A	HTRA3
84793	MIR124-1	HTT
2306	MIR10A	HULC
6338	MIR107	HVCN1
7024	MIR106B	HYAL1
406997	MIR100	HYAL3
2203	LUM	IBSP
27113	ARNTL	ICAM1
407007	LMX1A	ID1
406943	LLGL2	ID2
55902	LIFR	ID3
388796	LEPR	IDH1
51196	RPSA	IDO1
1033	LAMB3	IFIT2
993	LIN28B	IFITM1
891	RHOB	IFNAR2
9133	KRT8	IFNG
100506428	KPNA2	IGF1
406987	ARF6	IGF1R
387066	KCNH2	IGF2BP1
9586	B3GNT8	IGF2BP3
9076	JUP	IGFBP1
11009	JAG2	IGFBP2
9448	ITPKA	IGFBP3
139628	ITGB8	IGFBP4
1400	ISL1	IGFBP5
1809	ING1	IGFBP7
23135	AQP5	IGSF8
26167	IL15	IHH
100505746	AQP3	IKBKB
84133	IL11	IKBKE
1038	AQP1	IL10
3636	IL7	IL11
8314	IL2	IL12A
2308	IHH	IL13
10518	IGFBP4	IL13RA1
56996	IFNG	IL13RA2
100048912	ID3	IL17A
93663	HSPB2	IL17RA
51621	HSPA9	IL17RB
994	BIRC2	IL18
1030	HPGD	IL19
81631	HOXB9	IL1A
51100	HOXB7	IL1B
57758	APAF1	IL1RL1
23028	GZMB	IL2
10017	GUCY2C	IL22
6346	GSTT1	IL23A
374383	CTNNA3	IL24
407037	NOB1	IL2RG
56262	GRB2	IL32
574511	GPX3	IL34
6925	H19	IL4
2535	GPI	IL4R
2596	GNRHR	IL5
9698	GNB3	IL6
1965	GNAQ	IL7
1968	GNA12	IL7R
8894	GNA11	ILK
54822	BIN1	IMP3
79671	GLI2	ING1
100302201	TMEM97	ING4
8651	PDCD4	ING5
1786	BBC3	INHBA
149603	MTBP	INHBC
1460	ABL2	INPP4B
7126	B4GALT1	INPPL1
8452	HAVCR1	INS
29117	AGO1	IQGAP1
353189	GCNT1	IQSEC1
283120	GATA6	IRAK1
11339	GAS6	IRF7
103724390	GAS1	IRS1
23012	KLK13	IRS2
9181	GALNT3	IRX1
58191	SPDEF	IRX2
91875	SLC39A6	ISG15
84848	FSCN2	ITGA2
574506	ALPP	ITGA3
401237	IL27	ITGA4
407039	ALOX12	ITGA5
55959	HEY1	ITGA6
7474	ANGPTL2	ITGAM
388969	FOXC2	ITGAV
9263	TPX2	ITGB1
100130776	FHL2	ITGB2
311	FCGR2A	ITGB3
116986	EFEMP1	ITGB3BP
1894	MED19	ITGB4
9088	FABP5	ITGB5
2885	F7	ITGB6
6654	F2	ITGB8
3099	EREG	ITIH1
142	ERCC2	ITIH3
101805492	EPOR	IVNS1ABP
406913	EPHB4	JAG1
5296	EPHB1	JAG2
574456	ELF1	JAK1
90632	S1PR1	JAK2
2498	AGT	JAM3
64388	DPYSL3	JDP2
124540	DPYD	JUN
100506311	DPT	JUP
51729	DOCK1	KARS
2264	DNM2	KAT5
100507056	DCC	KATNA1
10891	CYP19A1	KCNH1
406916	CXADR	KCNJ1
10253	CTNNA1	KCNMA1
4317	CTLA4	KCNN4
5598	CST3	KDM1A
51082	CSPG4	KDM3A
693214	CSNK1A1	KDM4B
4040	CSF1	KDM4C
23641	CRYAB	KDM5A
27075	ADM	KDM6B
219699	KLF6	KDR
728978	KLF17	KEAP1
113246	ABCC2	KHDRBS1
3226	CCR5	KIAA0100
9982	CCR1	KIAA1524
6663	CLIC1	KIF14
285830	MMP21	KIF2C
5216	CHRM3	KIF3C
27086	PKP3	KIR2DL4
5725	IL24	KISS1
442915	KIF2C	KISS1R
5606	COPS5	KIT
1647	ADAM28	KITLG
5424	CGB	KL
6403	MGEA5	KLF17
6474	CFL1	KLF2
8061	CLDN16	KLF4
51552	CXCR6	KLF5
5599	OLFM4	KLF6
6464	PRDX4	KLF8
55353	UBD	KLK13
2944	CEBPB	KLK3
3224	SEMA4D	KLK4
619351	CREB3	KLK6
10810	FST	KLK7
641638	GPNMB	KLK8
688	RAPGEF3	KMT5A
102723356	NET1	KNG1
406928	STUB1	KRAS
23414	MSLN	KRT14
5361	TNK2	KRT17
494336	WASF2	KRT18
400619	CDH13	KRT19
9446	ADAM8	KRT20
1982	CDH11	KRT34
5708	ABCC5	KRT5
7415	CDH3	KRT6A
10428	FGFBP1	KRT7
50628	NR1H4	KRT75
3164	FGF19	KRT8
9052	DLEC1	L1CAM
400643	CDC25A	L1RE1
8609	KIF14	LAMA5
9804	G3BP2	LAMB3
7025	MRC2	LAMC2
1025	CDC6	LAMP3
541471	SETDB1	LAMTOR1
441094	MFAP3L	LAP3
574031	ELMO1	LAPTM4B
23642	CDK1	LARGE1
406900	SCRN1	LARGE2
51309	MAML1	LARP7
101234261	RNF144A	LASP1
10866	PIEZO1	LAT
503639	TM9SF4	LATS2
284836	RASSF2	LCN2
109	CD81	LCP1
9112	NOS1AP	LDHA
2619	ECE2	LECT1
114038	KIAA0100	LEF1
2355	SH3PXD2A	LEP
388906	IKBKE	LEPQTL1
23411	ZNF592	LEPR
8718	ISG15	LGALS1
1727	CLCA2	LGALS2
4864	KLK4	LGALS3
664	NCOR2	LGALS3BP
11012	IER2	LGALS8
158326	CD40LG	LGALS9
56649	CREB5	LGI1
5654	CLOCK	LGI4
8626	CXCL14	LGR4
8839	PTGES	LGR5
5376	NPEPPS	LHCGR
8412	GDF15	LIF
26986	MAGED1	LIFR
8404	SCARB2	LIMA1
7869	CD34	LIMK1
57556	HOMER1	LIMK2
9201	ITM2B	LIMS1
991	TNFRSF8	LIN28A
699	EPSTI1	LIN28B
358	CD80	LINC00312
2697	HTRA3	LINC00974
56241	TTYH2	LINC-ROR
4854	ATPIF1	LIPH
115201	SLC9A3R1	LLGL1
6446	LHX2	LLGL2
8878	CD22	LMCD1
9821	CD14	LMNA
7335	PDLIM7	LOX
7334	NUMBL	LOXL2
301	SCGB3A1	LOXL4
83734	LARGE	LPAR1
9447	LRRFIP1	LPAR2
7416	CD4	LRG1
4939	IL1RL1	LRP5
60673	LPAR2	LRP6
90407	UBXN11	LRRC26
55054	HGS	LRRFIP1
529	ARHGEF1	LTB4R2
51548	RABEP1	LTBP1
9655	CCNE2	LYN
9219	CCNB2	LYNX1
5452	SLC16A4	LYPD3
4162	CD1D	LYVE1
148170	KRT75	LZTS1
2149	CREB3L1	MACC1
9572	USP14	MACROD1
871	ESAM	MAEL
7162	DNAJA3	MAF
3814	CLDN2	MAGEA3
5817	ARTN	MAGEA9
25945	SPAG9	MAGEC1
4267	MPZL1	MAGEC2
8487	CCNG1	MAGED1
9169	NAT1	MAL
9351	NOL3	MALAT1
6298	CCNE1	MAML1
7270	WASL	MAOA
3678	P4HA2	MAP1LC3A
9531	CCND2	MAP1LC3B
2042	WASF1	MAP2
940	CPNE3	MAP2K4
4320	FUBP1	MAP2K7
3718	SQSTM1	MAP3K1
5911	HDAC3	MAP3K11
634	WISP1	MAP3K7
253012	WISP3	MAP7D3
768	CFLAR	MAPK1
6197	ADAM23	MAPK12
890	TNFSF13	MAPK13
221395	TNFRSF25	MAPK14
115557	AKR1C3	MAPK3
442901	RNASET2	MAPK7
574444	RUNX1	MAPK8
10919	SLC45A3	MAPK9
1667	COPS3	MAPKAP1
23468	DGKZ	MARCKS
728358	IFITM1	MARK2
10146	RERG	MASP2
6277	AJUBA	MBD1
10131	NUDCD1	MBD2
780	MAEL	MBNL1
30851	MAP4K3	MCAM
3312	ARHGEF39	MCF2
118429	ORAI1	MCL1
3897	GEMIN2	MCTS1
2303	HAVCR2	MDC1
4311	AGPAT9	MDK
355	CNDP1	MDM2
2161	CBX2	MECP2
81607	OGT	MED19
185	MYO18B	MED23
472	PPP1R9B	MET
9197	RETNLB	METAP2
101054525	TPST1	MFAP3L
186	CASR	MGAT3
2263	GNPTG	MGAT5
407030	MAP1LC3A	MGEA5
1235	CUL1	MGMT
6364	HOPX	MIA
51176	CUL4A	MIA3
430	HVCN1	MICA
8826	TBC1D3F	MIEN1
7296	CASP9	MIF
3918	ANTXR1	MIG7
1386	PPP1R1B	MITF
2033	SPARCL1	MKI67
9817	HDAC10	MKL1
684	ANGPTL6	MLANA
6354	CASP5	MLF2
6372	ATG10	MLH1
1437	HYAL3	MME
715	FERMT3	MMP1
55576	DYNLRB1	MMP10
4121	PITPNM3	MMP11
7103	FZD7	MMP12
1902	CAST	MMP13
8896	HIST3H3	MMP14
9170	ARID1A	MMP15
23566	CAPN2	MMP16
290	CHAF1B	MMP17
4489	CAMP	MMP2
4490	DIAPH3	MMP21
4493	SLC7A5	MMP26
4494	CALR	MMP28
4496	FXR1	MMP3
4498	MLF2	MMP7
4499	PTP4A2	MMP8
4500	CXXC4	MMP9
4501	CPEB4	MMS19
4543	NCOA4	MOB1A
644314	PREX2	MPL
26018	FBXO11	MPP3
6744	ASRGL1	MPZL1
57823	WLS	MRC2
4680	TUSC3	MRPL44
1048	CALCR	MSH2
7356	GALNT12	MSI1
3373	CDC73	MSLN
3553	PAGR1	MSN
3655	BHLHE41	MSR1
84968	MMP28	MSRA
4214	FAM134A	MST1
2048	DEK	MST1R
9332	TRPM8	MTA1
3685	GGCT	MTA2
51013	DDA1	MTA3
440926	LEPQTL1	MTAP
9037	PRDM2	MTBP
214	SLC30A4	MTDH
51754	ZNF148	MTHFR
3921	TRIM25	MTNR1A
952	ZBTB16	MTOR
3691	CA2	MTSS1
5337	CA1	MUC1
101	CNBP	MUC13
406902	ZFP36	MUC16
2043	YWHAG	MUC2
10143	XRCC5	MUC20
57584	XRCC3	MUC4
6363	XPA	MUC5AC
9462	WNT2B	MUC6
7097	WNT11	MUCL1
10333	WNT7B	MX1
929	WNT1	MXD1
27022	WEE1	MYB
90139	WARS	MYC
10371	VTN	MYCN
51079	VSNL1	MYD88
4722	VLDLR	MYH9
2274	VEGFB	MYO10
7033	VCP	MYO1B
80139	VAV2	MYO5A
6290	VASP	MYO9B
7099	UPK3A	MYOD1
6279	UPK2	MZF1
6280	UPP1	NAA10
6288	UGT1A	NAB2
9928	UGCG	NAMPT
1009	UCP2	NANOG
55616	TYRP1	NAT1
382	TYROBP	NBN
28964	PPIAL4E	NCL
406941	TXN	NCOA2
23705	TNFRSF4	NCOA3
9846	TSG101	NCOA4
4599	TSC2	NCOR2
117178	MIG7	NCR3LG1
64090	TRPC1	NDC80
3675	TRO	NDRG1
26064	TRAF6	NDRG2
7074	HSP90B1	NDUFA13
5909	NR2C2	NDUFB9
693121	TPO	NEAT1
11345	TPM2	NEDD4
80381	TPM1	NEDD4L
5338	TPD52	NEDD9
3914	TP73	NES
967	TNS1	NET1
9032	TNFRSF1B	NEU1
4248	TNFRSF1A	NEWENTRY
4921	TNFAIP2	NF2
1291	CLDN5	NFATC1
5295	C1QA	NFATC2
10657	TM4SF4	NFE2L2
4920	TSPAN7	NFIB
8856	TLR3	NFKB1
79581	TLN1	NFKB2
145624	TJP1	NGF
3205	KLF10	NGFR
1001	TH	NISCH
7345	TGFBR3	NKX2-1
9208	TGFB3	NKX3-1
3297	TG	NLRP1
71	TFE3	NLRP3
7052	NR2F2	NME1
79801	TFCP2	NME1-NME2
8751	TFAP4	NME2
8313	TERC	NME3
4324	TEK	NME9
6787	BUB1	NMU
8745	TRA	NOB1
4071	TCF12	NOD2
190	MIR639	NOG
8028	MIR622	NOL3
253559	TBXAS1	NOS2
1020	TBX2	NOS3
8851	TAP1	NOTCH1
717	KLF5	NOTCH3
10879	BST1	NOX1
51447	BRS3	NPEPPS
4212	STIM1	NPPA
826	STAT5A	NR1H4
147040	STAR	NR2C2
1281	SS18	NR2E3
4485	SSX2	NR2F2
3486	SSTR4	NR4A1
8556	SSR4	NR4A2
1788	SQLE	NRAS
7057	SPRR2B	NRF1
1002	SPRR2A	NRG1
56916	SPOCK1	NRP1
11218	SPN	NRP2
64778	SPINT1	NT5E
5908	SP3	NTN1
6820	SOX11	NTRK1
6707	SMO	NTRK2
6286	LYNX1	NTRK3
9290	SMARCC1	NUAK1
84171	BMPR2	NUCB2
5062	SLC22A2	NUCKS1
23136	SFTPA1	NUDCD1
9510	XAGE1B	NUPR1
23555	BMP5	OCIAD1
23671	UCA1	OCLN
1364	SLC2A3	ODAM
9914	SLC1A5	ODC1
81858	SKI	OGG1
4843	SIPA1	OGT
79784	PMEL	OLR1
9905	ST8SIA1	ONECUT1
2625	ST3GAL4	OPCML
4591	ST3GAL1	OPRM1
8337	FNDC3B	ORAI1
8338	NUCKS1	ORM2
2001	RASSF10	OSBPL5
1495	RFWD2	OSM
27	SET	OTUB1
3605	NOD2	P2RY2
2528	TMBIM1	P4HA2
2529	GAL3ST2	PAG1
2526	GOLPH3	PAK1
4645	SLC28A3	PAK4
4644	CDH23	PAK5
10082	SELPLG	PALLD
100190939	SDHD	PAQR3
7178	SDC2	PARD3
1493	CXCL5	PARD6A
5133	CXCL6	PARK7
6139	CCL24	PARP1
100526842	CCL22	PARVA
1829	CCL20	PARVB
1793	CCL19	PAX2
2147	CCL16	PAX3
2017	CCL14	PAX4
5364	CCL7	PAX5
2150	CCL3	PAX7
55065	CCL1	PAX8
9002	SCNN1A	PBX3
161742	SCN8A	PBXIP1
200734	BGN	PCA3
7803	SCN1B	PCBP1
10163	BGLAP	PCDH10
6418	S100P	PCDH9
168400	SORT1	PCMT1
3433	S100A1	PCNA
7088	BDKRB2	PCSK9
7795	RPS27	PDCD1
51072	RPS6KB1	PDCD4
6786	MIR486-1	PDCD6IP
55770	RPN2	PDGFB
6386	RPL39	PDGFRA
2011	ROS1	PDGFRB
3236	BCL9	PDIA3
975	ABCE1	PDLIM1
7481	RNH1	PDLIM7
2828	HPSE2	PDPN
10572	RNASE1	PEAK1
10920	RLN2	PEBP1
1447	RLN1	PEBP4
8260	RGS16	PECAM1
407975	ACTB	PELP1
406952	RGS4	PER1
3934	RGS2	PFN1
1730	REST	PGF
3696	UPF1	PGK1
55679	RCN1	PGR
3987	RBP2	PHB
11184	SENP2	PIAS1
57509	RBBP8	PIEZO1
310	ACE2	PIGR
1891	RARRES3	PIK3CA
29789	RARG	PIK3CG
64750	RAP1B	PIK3R1
57154	RAP1A	PIK3R2
7080	RALGDS	PIM1
4430	MOK	PIN1
9922	RAD21	PINX1
6019	RAC3	PIP
59350	RAC2	PIP4K2A
10733	RAB27A	PITPNM1
6839	BCAT1	PITPNM3
2294	PTPRR	PITX1
8543	BARD1	PITX2
5310	PTPRG	PIWIL1
54434	PTPRD	PIWIL2
6195	HAMP	PIWIL4
27330	BAK1	PKD1
2140	PTPN3	PKD3
602	PTPN2	PKM
4831	PTPN1	PKP3
4832	USP28	PLA1A
1183	MKL1	PLA2G10
407011	PCDH10	PLA2G16
9636	PTK6	PLA2G2A
7325	PTH1R	PLA2G3
9246	MIR518B	PLAGL1
57580	MIR193B	PLAU
9557	MIR493	PLAUR
23229	PTGS1	PLCE1
216	MIR20B	PLD1
8549	PTGFRN	PLD2
7187	PTAFR	PLEC
26092	CEMIP	PLG
7112	PSME2	PLK1
55914	BAD	PLK4
692225	RALGAPA2	PLOD2
27121	SALL4	PLPP5
326624	PAK7	PLS3
7180	APMAP	PLXDC1
203074	PLXDC1	PLXNB1
407029	CASS4	PLXND1
7220	ADAMTS9	PMEL
23246	C11orf30	PML
1164	PAK6	PMP22
4783	KCMF1	PODXL
6690	PSMA7	POMC
4773	RETN	POSTN
8128	MUC13	POU5F1
6929	MMP26	PPA1
55920	PRSS8	PPARD
1109	RELN	PPARG
3002	PRSS3	PPARGC1A
51728	LTB4R2	PPIA
10221	AZGP1	PPIAL4E
26263	PARD3	PPM1D
6500	PROC	PPP1R13L
619556	PRNP	PPP1R9B
55272	MAP2K2	PPP2CA
3832	MAP2K1	PPP3CA
5650	MAPK13	PPT1
3680	APOM	PRAF2
57522	UNC45A	PRAME
79767	DEFB103B	PRDM2
23191	PBK	PRDX1
8936	PRKCG	PRDX2
100616158	FOXJ2	PRDX4
81624	PRKCE	PRDX6
8879	DEPDC1B	PREP
8720	PARVA	PREX1
5774	ENAH	PREX2
81	RADIL	PRKAA1
4814	FRMD4A	PRKCA
138065	SLC48A1	PRKCE
5970	SLC39A4	PRKCG
6857	FERMT1	PRKCI
64689	SRGN	PRKCZ
65125	SMPD3	PRKD1
23616	TRPV6	PRKD2
7813	HES6	PRKD3
442891	PREP	PRKDC
8036	PPT1	PRL
79692	FBXW7	PRLR
118	IMP3	PRMT1
8522	PPP2CA	PRMT7
84231	WRAP53	PRNP
5806	PPP1R7	PROC
4615	PPP1R3A	PROM1
10013	LAMTOR1	PROX1
10801	SEMA4C	PRRX1
113251	WHSC1L1	PRSS3
84651	FNBP1L	PRSS8
83483	ESRP1	PSAP
4684	SYTL2	PSCA
84634	SAMD9	PSMA7
10893	TRIT1	PSMD10
27076	PPIA	PSME2
5264	RNF111	PSME3
3386	PPA1	PTAFR
7087	CT45A1	PTCH1
2886	FAM3B	PTEN
3567	PRRX1	PTGER1
939	GPR87	PTGER3
3265	PML	PTGES
5055	PTOV1	PTGIS
1901	PLSCR1	PTGS1
2826	PLS3	PTGS2
204	PLOD2	PTH1R
672	FXYD3	PTHLH
3698	PLEC	PTK2
1116	PLCG1	PTK2B
8111	PLCB2	PTK6
9770	PLAT	PTK7
5698	PLAGL1	PTP4A1
149428	PITX2	PTP4A2
594	PIP4K2A	PTP4A3
6080	PIN1	PTPN1
1031	PIK3R1	PTPN11
7329	PIK3CD	PTPN13
7975	PIK3CB	PTPN2
9521	PIGR	PTPN3
10168	ATP6V1C1	PTPN6
51374	SERPINB9	PTPRD
55004	SERPINE2	PTPRR
122664	SERPINA4	PTTG1
100689229	PGK1	PTX3
8581	GALNT7	PXN
5663	RSF1	RAB11FIP4
338399	ERAP1	RAB1A
969	ARID4B	RAB1B
3566	ENPP2	RAB22A
3596	ENPP1	RAB23
3559	PDK3	RAB25
3669	TMBIM4	RAB27B
2066	C14orf166	RAB37
643	TRIM33	RAB3D
5788	IL23A	RAB40B
10563	ACKR4	RAB5A
10663	EVL	RABEP1
7535	PDCD1	RABGEF1
5881	CLDN18	RAC1
8349	ZDHHC2	RAC2
1388	PLCE1	RAC3
10672	PCMT1	RACGAP1
54971	NDUFA13	RACK1
4888	GMNN	RAD21
10614	PCDH7	RAD51
9294	SOST	RADIL
6693	PCA3	RAF1
10755	PRDX1	RAG2
6367	CHST11	RALA
8022	FURIN	RALB
2261	PA2G4	RALBP1
84876	P2RY2	RALGAPA2
56924	CLDN11	RALGDS
29941	ALDH7A1	RAN
28984	OPRM1	RAP1A
5731	CRNN	RAP1B
5732	OPCML	RAPGEF3
10407	ODC1	RARB
5733	MIR425	RARG
54496	MIR424	RARRES3
79365	MIR381	RASA1
1230	MIR378A	RASAL2
8202	MIR376A1	RASSF1
116833	MIR375	RASSF10
21	NR4A2	RASSF2
959	NUCB2	RASSF5
79192	NTSR1	RB1
11315	NTS	RBBP8
170692	ROR1	RBM5
4758	NTF4	RCN1
4919	ATP2A3	RDX
9522	NOV	RECK
6783	NOTCH4	RECQL
657	NOS3	REG4
658	NFYC	RELA
659	NFE2L2	RELB
442908	NFATC2	RERG
29803	NF2	RET
406950	ATP1A1	RETN
8289	NEU1	RETNLB
23462	NCAM1	RFWD2
3202	NBN	RGS16
1237	HNRNPM	RGS2
3324	MYO5A	RGS5
3337	ZFHX3	RHOA
171221	MX1	RHOB
153090	ND1	RHOC
1601	COX2	RICTOR
8073	MSRA	RIOK3
55544	ASS1	RLN1
10765	MSH3	RLN2
6358	CITED1	RNASE1
56667	MIR374A	RNF111
360	MIR373	RNF180
246	MIR372	RNF41
6373	MIR376C	RNH1
2494	MIR342	ROBO1
8503	MIR328	ROCK1
6199	MIR326	ROCK2
25852	MPP3	ROR1
829	MPL	RPL39
1917	CD200	RPS27
6391	TRPM1	RPS6KA3
4486	MAP3K11	RPS6KB1
9122	ASAH1	RPSA
9123	CIITA	RRAS2
394	SCGB2A1	RRM1
9788	MAP3K1	RRP1B
9891	MDM4	RSF1
406965	MCF2	RTKN
27074	MBD1	RUNX2
968	MAPT	RUNX3
930	MAGEA3	RXRA
1843	SMAD6	S100A10
7402	MIR98	S100A11
8562	MIR93	S100A14
10059	MIR34B	S100A2
23604	MIR30D	S100A4
55669	MIR302A	S100A6
23032	MIR301A	S100A7
79038	MIR29B1	S100A8
8411	MIR27B	S100A9
8703	MIR26A1	S100B
171017	MIR24-2	S100P
5768	MIR23A	S1PR1
407042	MIR224	SAA1
100132116	MIR219A2	SAA3P
4092	MIR181A1	SAE1
574484	MIR212	SALL4
7764	MIR199B	SAMD9
2878	MIR199A1	SATB1
5931	MIR196A1	SATB2
6282	MIR194-2	SCARA3
6876	MIR194-1	SCARB2
10653	MIR191	SCGB2A1
26166	MIR190A	SCGB2A2
1558	MIR185	SCGB3A1
3398	MIR181A2	SCGN
51147	MIR17	SCN1B
8613	MIR16-1	SCRN1
55536	MIR15A	SCUBE2
574033	MIR153-2	SDC1
199713	MIR153-1	SDC2
354	MIR150	SDC4
118427	MIR140	SDCBP
115653	MIR138-1	SDHB
6406	MIR137	SDPR
3959	MIR135A1	SDR9C7
3094	MIR132	SELE
10581	MIR130B	SELP
51132	MIR130A	SELPLG
9722	MIR124-3	SEMA3E
81839	MIR103A2	SEMA3F
7127	MIR103A1	SEMA4B
11279	MIRLET7I	SEMA4C
1875	BCAM	SEMA4D
389421	LTBP1	SEMA5A
9723	ARNT	SEMA6B
10512	LRP1	SENP1
407054	LLGL1	SENP3
406910	LIMK2	SERBP1
54097	LIMK1	SERPINA5
4651	LIF	SERPINB3
7095	LHCGR	SERPINB4
23367	LGALS4	SERPINB5
4734	LGALS2	SERPIND1
302	LDHB	SERPINE1
5602	USP17L9P	SERPINE2
6934	LAMB1	SERPINF1
50943	LAMA5	SESN2
23492	RND3	SET
6926	LRRC26	SETD1A
861	ANXA2R	SETD2
6227	KRT34	SETDB1
10549	SETD8	SFN
8974	CLEC2A	SFRP1
2305	KRT18	SFRP2
4885	KRT17	SFTPA1
2893	CENPW	SGK1
10395	KRT6A	SH2B1
1523	KIFC1	SHC1
6515	KNG1	SHH
1490	KLRB1	SIAH1
25831	ACAT1	SIK1
4284	KCNMA1	SIRT1
375318	AGRN	SIRT6
361	KCNH1	SIRT7
362	MIA3	SIX1
29995	KARS	SKIL
407027	ANOS1	SKP2
4915	JAK1	SLC16A4
9682	ITIH3	SLC1A5
90	ITIH1	SLC2A1
149371	ITGB6	SLC2A3
92140	EIF6	SLC39A4
9862	ITGB2	SLC39A6
4241	ITGAM	SLC3A2
1195	ITGA9	SLC9A1
50807	IRF7	SLIT2
10263	INPPL1	SLITRK3
10923	INS	SLPI
11102	CXCL10	SMAD1
28956	INHBC	SMAD2
51639	INHBA	SMAD3
115482693	INHA	SMAD4
3490	ING2	SMAD6
6416	IL17A	SMAD7
84632	IL13	SMARCA4
9063	IL12A	SMARCB1
5265	IL11RA	SMARCC1
7009	IL9	SMARCE1
407008	CXCR1	SMO
9734	IL7R	SMPD3
83933	IL6ST	SMURF1
8470	IL4R	SMURF2
29028	IL3	SMYD3
11187	IGFBP7	SNAI1
3915	IGFBP1	SNAI2
406890	IGF2R	SNCG
1278	IGF2	SND1
9869	NME9	SOCS1
407055	IFNAR2	SOCS3
8897	IFIT2	SOD2
29085	AQP8	SOD3
4245	IRF8	SOX12
4084	CLEC4G	SOX17
5469	ICAM2	SOX2
3400	HYAL1	SOX4
5997	APOA2	SOX8
3201	APOA1	SOX9
5052	HSPG2	SP1
4811	HSP90AB1	SP3
168002	HSP90AA2P	SPAG9
1856	HSPA4	SPARC
9124	BIRC3	SPDEF
84299	HSD17B3	SPHK1
9232	HSD17B1	SPINK1
2059	HES1	SPINT1
10006	APEX1	SPINT2
1474	HRG	SPN
4488	ERAS	SPOCK1
1073	HPN	SPON2
10484	HP	SPP1
9829	HOXD9	SPRR2B
55785	HOXC13	SPRY4-IT1
10456	HOXB8	SQLE
55707	HOXA10	SRA1
6189	HOXA1	SRC
10411	HNRNPK	SRF
3170	HNRNPAB	SRGN
1182	HNRNPA1	SRPK1
11080	FOXA2	SRR
8780	NR4A1	SRXN1
7170	HMMR	SS18
7171	HLA-E	SSR4
574480	ANXA11	SSTR2
50616	ANXA7	SSTR4
58985	HK2	SSX2IP
442890	HIC1	ST14
4869	CFH	ST3GAL1
5352	ANXA4	ST6GAL1
10487	HDAC2	ST6GALNAC2
406931	HDAC1	ST8SIA1
5168	HTT	STARD13
3856	HAS1	STAT1
5888	SPANXA1	STAT3
400500	TBX21	STAT5A
79753	LMCD1	STAT5B
10928	IL19	STAT6
11075	LINC00312	STC1
2590	GUSB	STC2
80315	REPIN1	STIM1
10002	GSTM3	STK11
541466	PDIA3	STMN1
84904	CXCL3	STOML2
57186	BRD7	STUB1
6362	TBK1	STX2
4690	DROSHA	STX6
467	ARHGAP35	STYK1
60675	ATAD2	SULF2
151636	ANPEP	SUV39H1
83666	MCTS1	SUZ12
54625	GIT1	SYK
6778	GRB7	SYNJ2
23405	EPHA10	SYNPO2
9781	ANGPT1	SYTL1
2624	GPR4	SYTL2
147179	GPC1	T
407022	GNRH2	TAC1
1984	GNRH1	TACC3
8874	GNAI2	TACR1
52	GNAI1	TACSTD2
57591	HTRA2	TAGLN
8560	GLP1R	TAP1
4157	GLO1	TAZ
2915	GLI3	TBK1
5230	RABGEF1	TBL1XR1
10399	UTP20	TBX2
8854	GLG1	TBX21
10451	RPS6KA6	TBX3
54897	ERLEC1	TBXAS1
11141	FILIP1	TCF12
64321	DKK3	TCF3
9683	CACYBP	TCF7L2
23308	B3GAT1	TDGF1
5716	GHITM	TEK
407019	SND1	TERC
79623	NOX1	TERT
85369	FOXD3	TES
57464	GHSR	TET1
29966	GH1	TET2
8428	GFER	TFAP4
51765	GFAP	TFCP2
5500	GDNF	TFF1
6938	GDF2	TFF2
6098	LATS2	TFF3
5300	GCNT2	TFPI2
2245	NUPR1	TG
5923	FBXO8	TGFA
25975	GATA4	TGFB1
1662	RGS22	TGFB2
3487	ZBTB20	TGFBI
84654	TES	TGFBR1
3219	SERBP1	TGFBR2
3958	HINFP	TGFBR3
7226	SH2B1	TGIF2
2357	GALNT2	TGM2
8877	AMBP	THBS1
253962	KLK5	THBS2
3181	TNFAIP8	THPO
8913	PCSK9	THRB
441951	RICTOR	THY1
10365	ACKR1	TIAM1
85409	FUT4	TIMP1
59277	FUT2	TIMP2
81849	FUT1	TIMP3
140828	FUS	TJP1
3799	FTL	TLR2
4646	ABL1	TLR3
6450	FTH1	TLR4
8840	NR5A2	TLR9
5607	ALOX15	TM4SF1
100271849	IL17RA	TM4SF5
4240	TRIM29	TMBIM1
9815	CORO1C	TMBIM4
9265	CASP14	TMBIM6
404203	FPGS	TMEM100
5781	FOSB	TMEM207
23030	PRAME	TMEM88
54508	SCRIB	TMEM8B
100422847	SUZ12	TMEM97
23576	TTC9	TMPRSS2
5896	CBX7	TMPRSS4
8450	CBX5	TMSB15A
4017	SF3B1	TMSB4X
132864	FNTB	TNC
1893	COTL1	TNF
200186	NEDD4L	TNFAIP1
55107	USP22	TNFAIP2
54984	ADGRL3	TNFAIP3
7013	ATP11A	TNFAIP8
693158	PHLPP1	TNFAIP8L2
54845	MLANA	TNFRSF10A
51280	KDM4C	TNFRSF10B
2295	KDM4B	TNFRSF11A
4751	FAIM2	TNFRSF11B
2004	FOXL1	TNFRSF12A
554	FOXC1	TNFRSF1A
10961	TRIM32	TNFRSF1B
5201	FOXF2	TNFRSF25
7476	FOXF1	TNFRSF4
29122	ZHX2	TNFRSF6B
10220	VASH1	TNFSF11
27178	RRAS2	TNFSF12
89845	CASC3	TNFSF13
9991	FHL1	TNK2
63978	GPC5	TNN
9820	FGFR3	TNS1
7702	ALDOA	TNS2
54937	FGF8	TNS3
128239	FGA	TNS4
8325	SCUBE3	TOP2A
6886	FDFT1	TP53
7224	ADGRF5	TP63
3840	FCGR2B	TP73
442910	FBN2	TPBG
83719	VWCE	TPD52
29931	ALDH1A3	TPM1
64083	UNC5B	TPM2
494328	BPTF	TPM3
157310	ALDH3A1	TPP1
9644	FANCD2	TPST1
10966	FABP3	TPX2
9025	FABP1	TRAF4
4299	EYA2	TRAF6
7058	ALB	TRAP1
10155	ETV5	TRIM16
724025	ETV1	TRIM25
5396	ETS2	TRIM28
9766	ERBB4	TRIM29
9690	EPS8	TRIM32
7443	EPO	TRIM33
60436	STX2	TRIP10
5921	EPHB3	TRIT1
6319	EPHA7	TRPC1
400550	EPHA4	TRPM7
9635	EPHA1	TRPS1
54502	EP300	TRPV6
58495	SLC29A1	TSC2
9830	ENO2	TSG101
1139	ENO1	TSLP
377630	AIM1	TSPAN12
7163	EMP3	TSPAN2
7286	EMP1	TSPAN7
29956	MARK2	TSPAN8
3672	GKN2	TTC36
115	CRTC2	TTC9
30846	ELF5	TTF2
2060	TXLNA	TUBB4B
6660	ABCA2	TUSC3
9939	ELF3	TWIST1
3720	EIF5A	TWIST2
9099	EIF4EBP1	TXN
5652	EIF1AX	TXNDC12
51659	EGR3	TXNIP
59343	EFNB2	TYK2
26234	EFNB1	TYMP
56776	AGO4	TYMS
693183	EEF1A1	TYR
182	EDNRA	TYRP1
84312	EDN3	UBA2
391627	LPAR1	UBD
23421	ECE1	UBE2C
5026	E2F4	UBE2I
494330	E2F3	UBE2N
64326	AGTR1	UBE2V1
102157401	DUSP6	UCA1
90826	DUSP1	UCHL1
103611090	DSG1	UCP2
10370	DSC3	UGCG
10419	DPEP1	UGT2B15
83394	DMD	UGT2B17
9844	DIAPH1	UHRF1
6721	ADAMTS18	UIMC1
3454	DDX11	ULK1
11174	AES	UMPS
89797	ADGRF3	UNC45A
85028	DDIT3	UNC5B
152573	GADD45A	UPF1
129049	DDC	UPP1
6737	DBN1	USP14
2130	DAG1	USP22
2313	CD55	USP28
3861	DAB2	UTRN
4086	CYP11A1	VANGL1
22997	CYP2J2	VASH1
100616119	AGR3	VASP
23531	CYP1A1	VAV2
6614	ADRB2	VAV3
4914	DAB2IP	VCAM1
4541	CTSZ	VCAN
3237	CTSS	VCP
2537	DPPA2	VDR
113130	CTBP2	VEGFA
9894	DIRAS1	VEGFB
51513	CSTA	VEGFC
4641	CSNK2B	VEGFD
23002	TTC36	VEZT
23199	PIWIL4	VIM
8140	CACUL1	VLDLR
91107	SRXN1	VMP1
140809	CRX	VSNL1
158376	HAPLN1	VTCN1
2965	AAMP	VWCE
23636	CRK	WASF1
51164	ATF2	WASF2
22822	CR1	WASF3
494326	CLDN3	WASL
8451	CPE	WFDC2
100132074	ADORA2B	WIF1
8322	AFAP1L1	WISP1
8476	134079	WISP2
5287	TMEM207	WISP3
6348	COL4A6	WLS
401022	COL1A2	WNT1
406919	CNR1	WNT11
79733	ZG16B	WNT2B
23499	ACKR2	WNT3A
54765	CCR4	WNT5A
1994	JDP2	WNT7B
7075	SDR9C7	WRAP53
716	TPP1	WSB1
649	SSX2IP	WT1
9647	SNAP47	WWOX
4635	CKS1B	WWP1
23406	FMNL2	WWTR1
3858	NLRP3	XAGE1B
100126313	CHRNA7	XCR1
6666	CHRNA4	XIAP
2254	MGAT4A	XRCC1
100422840	PRAF2	XRCC2
6198	DDX20	XRCC5
7022	AKAP13	YAP1
3306	KLK8	YBX1
10713	CHEK2	YES1
134265	WIF1	YWHAE
8440	LZTS1	YWHAG
79603	FSTL1	YWHAZ
84100	BVES	YY1
8100	CHEK1	ZBTB16
7480	KATNA1	ZBTB20
328	ADAMTS13	ZBTB33
10212	ESM1	ZBTB7A
6310	DNAJB4	ZDHHC2
9113	UBE2C	ZEB1
5520	WWP1	ZEB2
3780	ADRM1	ZFAS1
9061	TMSB15A	ZFHX3
1903	METAP2	ZFP36
10096	FERMT2	ZFX
200315	RAB40B	ZHX2
10413	CBX1	ZNF148
1499	STARD3	ZNF217
114569	RALBP1	ZNF350
10123	PPARGC1A	ZNF382
84444	FGL2	ZNF592
2262	NMU	ZNF703
3485	RUVBL2
83698	PPP1R13L
9060	CCR9
2530	KDM5B
2523	MASP2
2524	SLC12A7
3838	CETN1
407017	TNFSF13B
1746	KHDRBS1
90627	IGF2BP1
5451	IVNS1ABP
8242	SCGN
2139	SIVA1
407056	GLRX3
406932	KAT5
693235	SEMA3C
5867	SEMA6B
7706	HOXB13
101929447	MERTK
407010	TACC3
8871	BAIAP2
8867	HAX1
7049	VAV3
23423	FAM3C
144165	RBM14
50488	PRMT5
7398	SPON2
5518	NDC80
5515	TUBB4B
100131096	TUBB3
406949	SEMA3A
2258	CITED2
1464	TFG
1745	IKZF1
2556	EFS
23196	OLIG2
7409	PSME3
1215	CDK4
6566	ALYREF
27349	RBM5
28985	BLACAT1
3936	TRIM28
6240	ABI2
6241	TSPAN2
50484	CDH12
10554	ACTR2
7572	ACTR3
100126328	LINC-ROR
8569	SAE1
2872	UBA2
10644	MICA
83943	OCLN
121665	CBR3-AS1
23019	DNAJB6
25937	MIR2861
1536	MIR103B2
970	MIR1908
4659	MIR1236
407034	MIR103B1
3429	FRAT1
[truncated: 1,202 more rows]

## Sheet: Table_S4
Table_S4. Hypergeometric tests with the three metastasis marker database (TMMGdb, CMGene, HCMDB)
E.Pval	DB	P value	negative log10(p value)
0.001	TMMGdb	0.0443	1.35325
0.005	TMMGdb	0.0022	2.65623
0.01	TMMGdb	0.0004	3.41108
0.001	CMGene	0.0731	1.13623
0.005	CMGene	0.0019	2.71346
0.01	CMGene	0.0122	1.91453
0.001	HCMDB	0.2785	0.555226
0.005	HCMDB	0.0084	2.07676
0.01	HCMDB	0.0347	1.45907

## Sheet: Table_S5
Table_S5. GSEA results applied to the breast metastatic associated terms in DisGeNET database
P-value <0.01
P-value <0.05
epval	DisGeNET term	P-value	shared genes
0.005	Infiltrating duct carcinoma of female breast	0.00135677	CAMK1G_CDK15_FGFR1
0.01	Invasive carcinoma of breast	0.00161363	GRB7_HDAC1_F2R_TSC2_TNFRSF11A_PTGS2_HSD17B7_MMP9_CD1A_NCOR1_IRF1_FAT1_THRSP_NLRP1_ARF6_FGFR1
0.005	Invasive carcinoma of breast	0.0059258	GRB7_IRF1_F2R_FAT1_THRSP_TNFRSF11A_NLRP1_PTGS2_MMP9_FGFR1
0.01	Infiltrating duct carcinoma of female breast	0.00675179	CAMK1G_CDK15_FGFR1
0.001	Invasive carcinoma of breast	0.0200825	GRB7_IRF1_TNFRSF11A_PTGS2
0.001	Infiltrating duct carcinoma of female breast	Nan	Nan

## Sheet: Table_S6
Table_S6. T-test results and the number of adjacent MGs for the 202 MGs identified with EP cutoff 0.005
Not significant on T-test
one or more adjacent MGs		(NaN: gene is not available in the PPI network)
gene	FS	empirical P value of FS	P value of T-test	Not significant on T-test (P value > 0.1)	N. of adjacent MGs in PPI network	one or more adjacent MGs in PPI network
ZNF676	0.123038	0	0.109192	Y	0	N
FAM163B	0.0936314	0	0.0319662	N	0	N
LDOC1	0.0878362	0	0.000103777	N	1	Y
FAM78B	0.0874894	0	7.1273e-06	N	0	N
IRF1	0.086791	0	0.0590061	N	0	N
SLFNL1	0.0808985	1.1588e-05	7.5867e-06	N	0	N
CHRNA5	0.0795127	1.1588e-05	0.0252563	N	0	N
STK40	0.0776414	1.1588e-05	6.70686e-05	N	0	N
MISP	0.0673326	2.31759e-05	7.05825e-08	N	0	N
SPPL2C	0.063177	3.47639e-05	0.00494492	N	0	N
TMPRSS5	0.0629985	3.47639e-05	2.39529e-05	N	0	N
GRB7	0.0609505	4.05578e-05	0.00042153	N	1	Y
CCDC93	0.0573294	6.37338e-05	0.00220723	N	2	Y
CLDN4	0.0534201	8.11157e-05	0.0454154	N	2	Y
LINGO3	0.0525076	8.11157e-05	0.174245	Y	NaN	NaN
CERS4	0.0487428	0.000104292	0.00165637	N	0	N
CTXND1	0.0468014	0.000127468	0.339699	Y	NaN	NaN
PLK2	0.0453458	0.000133261	0.168922	Y	2	Y
ZBED3	0.0426736	0.000185407	0.0313571	N	1	Y
ALOXE3	0.041407	0.000202789	0.00644843	N	3	Y
RGS4	0.0412201	0.000202789	0.000116611	N	0	N
PLSCR2	0.0409605	0.000208583	0.0100029	N	0	N
FAM193A	0.0380486	0.000260729	0.727297	Y	0	N
EGR2	0.0372157	0.000272317	0.0733022	N	0	N
GSTM5	0.0367617	0.000283905	8.77129e-06	N	0	N
OTOGL	0.0357936	0.000318669	0.784966	Y	NaN	NaN
SPTSSA	0.0342221	0.000376609	0.0125906	N	1	Y
ESRP2	0.0335103	0.000411372	0.000598338	N	0	N
BSPRY	0.0332182	0.000411372	0.927606	Y	0	N
SOX15	0.0331173	0.000428754	0.00311068	N	0	N
KRT13	0.0328728	0.000440342	0.000489883	N	4	Y
VCPKMT	0.0327594	0.00045193	0.115882	Y	0	N
SLC28A1	0.0326183	0.000457724	0.0312822	N	NaN	NaN
BTBD8	0.0321704	0.000469312	0.196386	Y	0	N
SLC16A1	0.0311381	0.000544634	2.41011e-06	N	0	N
C4orf45	0.0308364	0.000562016	0.942576	Y	0	N
GOLM1	0.0307737	0.000562016	0.102812	Y	2	Y
IFT80	0.0300722	0.000590986	0.0281343	N	0	N
TAF8	0.029309	0.000619956	0.00182814	N	1	Y
KCNQ5	0.0292812	0.000619956	0.000101472	N	0	N
KRT4	0.0284032	0.000689483	0.124859	Y	3	Y
FBLN7	0.0283851	0.000689483	3.98317e-05	N	0	N
SEMA4D	0.0280109	0.000712659	0.0151526	N	1	Y
PTGS2	0.0279758	0.000718453	0.000835347	N	1	Y
EXOSC10	0.0276942	0.000747423	0.00860097	N	0	N
H2BU1	0.0273251	0.000764805	0.00183949	N	0	N
GAP43	0.0270622	0.000787981	0.889839	Y	0	N
FOXC2	0.0269218	0.000805363	0.0138556	N	1	Y
RNF223	0.0266666	0.000822745	3.74339e-06	N	NaN	NaN
LSM1	0.0265532	0.000828539	0.000144878	N	0	N
TNFRSF11A	0.0258254	0.000892273	0.146633	Y	0	N
SH3BGRL	0.0250922	0.000938624	0.642498	Y	0	N
PNMT	0.0243399	0.00099077	0.000936658	N	0	N
HOPX	0.024314	0.000996564	0.00114062	N	0	N
KRT24	0.0241457	0.00101395	0.0832097	N	3	Y
OR52E8	0.0236033	0.00108927	0.107547	Y	NaN	NaN
ALOX12B	0.0235519	0.00110665	0.083871	N	1	Y
SNX9	0.0233756	0.00112983	0.971509	Y	0	N
SH2D3A	0.0233495	0.00114141	0.0265566	N	2	Y
IGLON5	0.0231992	0.00116459	0.00821219	N	NaN	NaN
CCDC138	0.0231	0.00117618	0.225532	Y	1	Y
TRIM32	0.0230493	0.00118777	0.00387035	N	1	Y
WFDC2	0.0225819	0.00129785	0.00943538	N	0	N
THRSP	0.0225732	0.00129785	0.665089	Y	1	Y
LDB3	0.0225516	0.00130364	0.770511	Y	0	N
RTRAF	0.0222587	0.00135579	0.0107542	N	0	N
SRD5A3	0.0221599	0.00136738	0.00511753	N	0	N
RHBG	0.0219717	0.00141373	0.00187465	N	0	N
FAT1	0.0219151	0.00142532	0.0841423	N	0	N
TM2D2	0.021773	0.00144849	8.67025e-06	N	0	N
RND1	0.0217675	0.00144849	0.00133732	N	2	Y
HS3ST6	0.0213434	0.00148905	0.0209315	N	0	N
AZGP1	0.0212517	0.00149485	0.208698	Y	3	Y
GRIFIN	0.0211303	0.00151223	0.220202	Y	NaN	NaN
SRCIN1	0.0207747	0.00156437	0.0171264	N	0	N
CORO2B	0.0206247	0.00159334	0.0256788	N	0	N
GK	0.0205557	0.00161073	0.00195644	N	4	Y
ELAVL1	0.0205291	0.0016339	0.805131	Y	14	Y
EGLN2	0.0205271	0.0016397	0.0250333	N	0	N
JAG1	0.0202614	0.00171502	0.805519	Y	0	N
QPCT	0.0202078	0.00172661	0.0575355	N	0	N
DDX43	0.0201705	0.0017324	0.0206276	N	0	N
KRT9	0.0199991	0.00174399	0.0109874	N	1	Y
CAAP1	0.0198265	0.00178455	0.117663	Y	1	Y
CACNG4	0.019681	0.00181931	6.63439e-06	N	0	N
SRP14	0.0196637	0.00181931	1.44869e-05	N	2	Y
KRT23	0.0195306	0.00185987	0.00470166	N	0	N
A4GNT	0.0194796	0.00186566	0.0355382	N	0	N
VIT	0.0188852	0.00200472	0.538937	Y	0	N
TSKS	0.0186923	0.00205686	0.205478	Y	0	N
PTGDR2	0.0185806	0.00210901	0.265482	Y	0	N
MMP9	0.0184936	0.00212639	0.000488793	N	0	N
JAM2	0.0183908	0.00217274	0.000158658	N	0	N
JUP	0.0182356	0.00222489	0.00106724	N	3	Y
TEX52	0.0181712	0.00225386	0.215002	Y	NaN	NaN
PPFIA4	0.0180927	0.00228283	1.12042e-05	N	0	N
ISLR2	0.0180877	0.00228283	0.0424999	N	0	N
RASGRF1	0.0180018	0.00231759	0.351858	Y	0	N
KLLN	0.0177177	0.00241609	0.221008	Y	0	N
AMBP	0.0176678	0.00242768	0.0035191	N	0	N
CDK15	0.0175763	0.00245665	0.00989136	N	1	Y
FAM177A1	0.0175504	0.00246244	9.41899e-05	N	1	Y
CCDC28A	0.0175355	0.00247982	0.0111098	N	1	Y
NPW	0.017482	0.00250879	0.166842	Y	0	N
SLC22A14	0.0174767	0.00250879	0.000686901	N	0	N
CH25H	0.017464	0.00250879	0.879294	Y	0	N
TXLNA	0.0173694	0.00256673	6.94738e-06	N	5	Y
SCGB1D2	0.0173296	0.0025957	3.19874e-05	N	2	Y
WTAP	0.0171586	0.00263047	0.00281854	N	4	Y
PAX5	0.0171132	0.00264205	0.288129	Y	0	N
PLLP	0.0170421	0.00268261	0.00143058	N	0	N
C11orf80	0.0170389	0.00268261	0.000310196	N	0	N
TPK1	0.016964	0.00274055	0.313743	Y	0	N
ARL17B	0.0168914	0.00278111	0.432616	Y	NaN	NaN
NEK10	0.0167991	0.0027869	0.609321	Y	0	N
ABCA1	0.0167745	0.0027869	0.0352983	N	0	N
NPEPPS	0.0167125	0.00281008	0.410759	Y	0	N
NRG4	0.016712	0.00281008	0.00973957	N	0	N
GHRH	0.0166758	0.00281587	0.200802	Y	0	N
H3-3B	0.0166385	0.00283326	0.0258119	N	0	N
KRT38	0.016625	0.00284484	0.670896	Y	5	Y
CASQ2	0.0165575	0.00285643	0.0290227	N	0	N
CNGA4	0.0165501	0.00286223	0.8421	Y	0	N
F2R	0.0164165	0.00293755	5.22148e-06	N	0	N
GCNT4	0.0164143	0.00293755	0.00138595	N	0	N
ZFY	0.0164055	0.00293755	0.145148	Y	0	N
PRB2	0.0162978	0.0029781	0.0334702	N	0	N
MAB21L1	0.0162801	0.00298969	0.00154067	N	0	N
PTH2R	0.0162443	0.00301287	0.0126362	N	1	Y
C3orf80	0.0162426	0.00301287	0.778533	Y	NaN	NaN
LAMP5	0.0161581	0.00306501	0.00182872	N	0	N
HR	0.0161353	0.00309398	0.347927	Y	0	N
GBP3	0.015973	0.00319248	0.169356	Y	0	N
PLA2G4C	0.0158827	0.00325042	0.079889	N	0	N
ALPK1	0.0157881	0.00328519	0.0279045	N	2	Y
FOLR1	0.0157429	0.00330836	0.0192574	N	1	Y
NUTM2E	0.0156859	0.00333733	0.0518871	N	NaN	NaN
TAS2R7	0.0155583	0.00338948	0.0224089	N	0	N
COX6B2	0.0155297	0.00339527	0.949741	Y	0	N
CCL21	0.0155198	0.00340106	0.000642169	N	0	N
DOLK	0.0155134	0.00340106	6.97455e-06	N	0	N
DBNDD2	0.0154893	0.00341845	0.0677652	N	0	N
PLOD2	0.0154557	0.00345321	0.00108275	N	0	N
COL6A5	0.0154243	0.003459	0.00892612	N	0	N
H2AC17	0.0154218	0.003459	0.0242814	N	1	Y
KCNJ3	0.015395	0.0034648	0.0419655	N	0	N
UBP1	0.015383	0.00347639	0.54589	Y	3	Y
ARHGDIB	0.0153703	0.00347639	0.784342	Y	0	N
PHF21B	0.0153628	0.00348797	0.07655	N	0	N
FARS2	0.0153587	0.00348797	0.00622354	N	2	Y
ARHGEF35	0.0153525	0.00349377	0.46002	Y	1	Y
GPR12	0.0153135	0.00351115	0.0188763	N	0	N
EIPR1	0.0153129	0.00351115	0.673961	Y	1	Y
NRBP1	0.0152027	0.00358647	0.105374	Y	0	N
GDF6	0.0151069	0.003656	0.373802	Y	0	N
FAH	0.0149804	0.00374291	0.968215	Y	0	N
ZDHHC11B	0.01495	0.00378347	0.453878	Y	0	N
ESM1	0.0149319	0.00380664	0.00889018	N	0	N
KRT79	0.0149233	0.00381244	0.0182312	N	3	Y
CLEC5A	0.0149131	0.00381823	0.00685854	N	0	N
XCL1	0.0148692	0.00384141	0.768507	Y	0	N
GPLD1	0.0148672	0.00384141	0.0739006	N	0	N
OR7D2	0.0148358	0.003853	0.142309	Y	0	N
UAP1	0.0147709	0.00388197	9.81018e-05	N	1	Y
CPEB1	0.0147408	0.00389355	0.284038	Y	1	Y
PGBD1	0.0145845	0.00402102	0.630877	Y	0	N
IRF6	0.0145281	0.00406737	0.256583	Y	0	N
WNT7A	0.0145064	0.00409634	0.906954	Y	0	N
MOGAT1	0.0144935	0.00409634	0.00201922	N	0	N
FGFR1	0.014464	0.00411952	0.000126138	N	0	N
PWWP3A	0.0144104	0.00418325	0.394913	Y	1	Y
WT1	0.0144046	0.00418905	0.00236335	N	3	Y
FUT4	0.0143457	0.00421802	0.000739686	N	0	N
MYL2	0.0143377	0.00422381	0.452524	Y	0	N
FAM171A2	0.0143311	0.00422381	0.670456	Y	0	N
NLRP1	0.0143101	0.00424119	0.20424	Y	0	N
KCNK12	0.0142937	0.00425278	0.222005	Y	0	N
PAK1	0.0142801	0.00425857	0.099897	N	0	N
ASPHD1	0.0142488	0.00426437	0.910574	Y	0	N
FMO1	0.0142452	0.00427016	0.0648964	N	0	N
ADGRG1	0.0142179	0.00429913	0.190319	Y	0	N
AC090517.4	0.0141954	0.00431651	0.136163	Y	NaN	NaN
LRRC63	0.0140645	0.0044266	0.0688468	N	NaN	NaN
PIWIL2	0.0140515	0.00443819	0.315864	Y	0	N
AL162231.1	0.0140321	0.00444977	0.671184	Y	NaN	NaN
IBSP	0.0139943	0.00449033	0.00425013	N	0	N
ZNF799	0.0139609	0.00451351	0.50942	Y	0	N
NAP1L3	0.0138485	0.0046178	0.0081503	N	0	N
FUT9	0.0138249	0.00466415	0.0923469	N	1	Y
ATP6AP1L	0.0138211	0.00466415	0.817066	Y	NaN	NaN
ACVR1C	0.0137784	0.00469312	0.428434	Y	0	N
TESMIN	0.013772	0.00469312	0.00948014	N	0	N
STEAP4	0.0137679	0.00469892	0.0754081	N	0	N
SNRPD1	0.0137177	0.00474527	0.332982	Y	0	N
CAMK1G	0.0136603	0.00479741	0.0184932	N	0	N
ZNF592	0.0136596	0.00479741	0.00654516	N	0	N
PRR4	0.0135763	0.00488432	0.000203976	N	1	Y
ILDR2	0.013555	0.00489591	0.00520406	N	0	N
RGS7	0.0135441	0.00489591	0.00229043	N	0	N
DUSP1	0.0135434	0.00489591	0.184236	Y	1	Y
CYP4B1	0.013537	0.00490171	0.0606689	N	0	N
HSD17B8	0.0134977	0.00495385	0.00172366	N	0	N
